# Supplementary material for: Ciliary neurotrophic factor stimulates cardioprotection and the proliferative activity in the adult zebrafish heart
Source: NPJ Regen Med. 2019 Jan 24;4:2. doi: 10.1038/s41536-019-0064-9 (PMC6345746; doi:10.1038/s41536-019-0064-9)
Supplement: Supplementary file 2 — Suppl. Data S1 [file 41536_2019_64_MOESM2_ESM.xlsx]

## Sheet: 0 dpt vs 1 dpi- up
geneID	foldChange	log2FoldChange	pval	padj
actb1	2.2897	1.19516	1.2616e-07	1.00644e-05
anxa2a	6.89553	2.78566	1.69048e-29	4.56831e-26
spock3	1.8424	0.881584	0.00387632	0.04947
zgc:158463	3.74931	1.90662	3.26306e-15	1.46967e-12
fn1b	4.99374	2.32012	1.22093e-11	2.39957e-09
krt18	5.61722	2.48986	2.74343e-26	5.39183e-23
fabp11a	2.17735	1.12257	3.49268e-07	2.5259e-05
c6	2.8828	1.52747	3.63044e-11	6.48648e-09
tuba8l4	1.59346	0.672166	0.00193896	0.029437
krt4	6.36886	2.67104	1.51152e-18	1.08925e-15
gapdhs	2.68505	1.42495	2.74752e-10	4.0684e-08
s100a10b	3.15662	1.65838	3.02979e-12	7.04313e-10
csrp3	1.67934	0.747892	0.000959561	0.0173451
ctsla	1.65696	0.728541	0.000687552	0.0134518
col1a1b	2.15762	1.10944	1.39585e-06	8.16399e-05
cfl1	2.19867	1.13663	1.26939e-07	1.00893e-05
icn	1.69911	0.76478	0.00070577	0.0136721
cd63	3.29086	1.71846	6.24067e-14	2.07565e-11
srgn	1.68207	0.750234	0.00086435	0.0159168
anxa1a	2.39009	1.25707	3.31128e-08	3.03333e-06
flna	1.91852	0.939991	0.000116988	0.00337673
col1a2	1.97303	0.980414	1.51964e-05	0.000616255
col1a1a	2.72472	1.44611	2.62228e-10	3.90972e-08
calm1a	1.88398	0.913783	4.38727e-05	0.001482
MUSTN1	2.76536	1.46746	6.45267e-11	1.10715e-08
tuba8l	3.80918	1.92948	5.31638e-14	1.79586e-11
msna	2.4223	1.27638	4.20475e-05	0.00143154
ubc	1.65799	0.729436	0.00114567	0.0197199
pfn1	2.4584	1.29772	3.2802e-08	3.03046e-06
aldh1a2	3.65605	1.87029	7.69067e-16	3.77874e-13
COL5A2 (2 of 2)	1.81849	0.862738	0.000115028	0.0033335
cav1	1.69329	0.759826	0.00144282	0.0233127
myl12.1	1.72356	0.785391	0.000403137	0.00889329
BX296557.7	3.46482	1.79278	7.23957e-07	4.61688e-05
cyb5r3	2.41843	1.27407	3.12055e-08	2.9079e-06
fstl1b	1.94979	0.963322	1.07133e-05	0.000461375
sdcbp2	1.65147	0.723753	0.00131618	0.0217614
arf2	1.59025	0.66925	0.00250021	0.0356778
timp2b	112.716	6.81655	1.08099e-88	2.33699e-84
canx	2.04729	1.03372	3.29317e-06	0.000169512
mvp	3.97587	1.99127	6.2766e-17	3.6674e-14
kcnh6	1.78865	0.838869	0.000132282	0.00371404
anxa13	2.19099	1.13158	1.65585e-05	0.000662921
lgmn	1.72824	0.7893	0.000777444	0.0146407
ctsd	1.70256	0.767708	0.00104316	0.0184831
ctsba	2.12074	1.08456	4.13612e-06	0.000205561
hsp90b1	3.06882	1.61768	3.95784e-12	8.55646e-10
hspa5	2.70514	1.4357	2.58296e-09	3.17278e-07
zgc:153867	2.1166	1.08175	2.13385e-06	0.000117086
ywhaz	2.69106	1.42817	6.08184e-10	8.32173e-08
calr	4.23137	2.08113	1.40602e-18	1.04816e-15
perp	1.89078	0.918984	3.64738e-05	0.00127387
tpm3	2.17769	1.1228	1.24754e-06	7.32895e-05
KRT18 (2 of 3)	3.49411	1.80493	1.67927e-14	6.25933e-12
fn1a	25.6786	4.68249	1.23904e-60	1.33934e-56
ptmaa	1.61429	0.690898	0.00237768	0.0343772
col6a3	1.65866	0.730022	0.00116321	0.0199266
tagln2	2.35789	1.2375	4.63466e-08	4.1548e-06
si:dkey-153m14.1	3.11608	1.63973	3.21632e-06	0.000166747
sparc	1.75867	0.814488	0.000488965	0.0102928
ppdpfb	1.65825	0.729663	0.00289197	0.0396711
eif5a2	2.07247	1.05135	3.24444e-06	0.000167803
mdka	4.86646	2.28287	3.64614e-21	4.14873e-18
jak1	1.93151	0.949726	4.29329e-05	0.00145253
CT956064.3	3.49787	1.80648	2.97737e-13	8.46943e-11
adam10a	2.02703	1.01937	8.27155e-06	0.000368706
crip1	2.11608	1.0814	3.29169e-06	0.000169512
ywhaqb	2.96968	1.57031	3.3352e-11	6.00863e-09
marcksl1a	2.25758	1.17478	9.92223e-07	6.02214e-05
hmgn2	2.24942	1.16956	7.18295e-05	0.00224081
hnrnpa0b	1.60994	0.68701	0.00308694	0.0414513
arf1l	1.64299	0.716322	0.00213856	0.0316475
pfn2l	1.67421	0.743483	0.000839092	0.0155444
il6st	2.05539	1.03941	6.4052e-06	0.000297793
ap2m1a	1.72453	0.786207	0.000834808	0.0154861
twf2b	2.00027	1.00019	3.88566e-05	0.00134573
hmga1a	1.86299	0.897623	0.000128185	0.00362728
si:dkey-97i18.5	23.9113	4.57962	3.19472e-05	0.0011416
ptmab	2.99583	1.58296	0.000235275	0.00589387
rab11a	1.6523	0.724477	0.00232914	0.0338625
atp6v0ca	2.3726	1.24647	3.64116e-07	2.59796e-05
serpine1	4.75549	2.24959	2.51477e-13	7.34687e-11
ehd2	1.57918	0.659179	0.00389805	0.0495764
C25H11orf96	1.6925	0.759158	0.00139036	0.0226342
col5a1	4.37721	2.13001	1.24014e-17	8.12442e-15
mmp9	247.287	7.95004	6.34162e-06	0.000296111
si:dkey-226m8.7	2.68504	1.42494	0.000129369	0.0036512
cotl1	7.11022	2.82989	1.24601e-26	2.69375e-23
mapre1b	1.79206	0.841619	0.000523597	0.0108738
tmed2	1.68523	0.752949	0.0017338	0.0268727
klf2b	2.40687	1.26716	0.00143234	0.0232127
cpne1	1.73373	0.793875	0.000780851	0.0146921
ACTN4 (2 of 3)	1.79505	0.844027	0.000392299	0.00876147
cdc42l	2.81797	1.49466	3.74269e-10	5.39422e-08
WDR1	2.33254	1.2219	2.92562e-07	2.15867e-05
CD68	1.63861	0.712471	0.00376193	0.0484102
SHISA4 (2 of 3)	1.84041	0.88003	0.000216258	0.00548741
tmed9	1.8687	0.902038	0.00010629	0.00309687
capn2a	2.50171	1.32292	5.89233e-08	5.07515e-06
THBS1 (2 of 2)	3.09226	1.62866	1.02451e-11	2.05082e-09
nccrp1	1.88686	0.915986	0.000184757	0.00490094
ctsc	1.74567	0.803778	0.00153261	0.0243808
rpz5	2.21881	1.14979	0.000345694	0.0079515
elovl1b	3.45904	1.79037	1.24441e-12	3.28085e-10
ssr3	2.5148	1.33044	2.87659e-08	2.69217e-06
psma3	1.87143	0.90414	0.000137564	0.00382754
prdx6	1.81414	0.859284	0.000516378	0.0107549
psma5	1.75028	0.807585	0.000844005	0.015622
cebpb	1.79565	0.844508	0.00136755	0.0224318
socs3b	3.79887	1.92557	2.03483e-13	6.10985e-11
si:ch211-114n24.6	1.72254	0.784538	0.00111248	0.0192714
ACTR3 (1 of 2)	1.83462	0.875484	0.000342099	0.00790153
psmd1	1.75311	0.809913	0.000897752	0.0163923
sdc4	1.76102	0.81641	0.000372087	0.00839682
col12a1a	8.81218	3.1395	6.8427e-31	2.11332e-27
ehd1b	1.96364	0.973532	9.26399e-05	0.00277778
lrrc15	2.27329	1.18478	9.06355e-06	0.000402351
ddost	2.55645	1.35414	7.99175e-08	6.77544e-06
iqgap1	1.77485	0.827695	0.000770313	0.0145445
col6a2	1.56431	0.645522	0.00372632	0.0480761
calrl	3.46128	1.79131	2.27409e-13	6.73475e-11
ppp2cb	1.611	0.687952	0.00246168	0.0352677
ilf2	1.84376	0.882649	0.000406897	0.00896708
ywhaqa	2.31841	1.21314	1.0577e-06	6.31671e-05
mrps15	2.12974	1.09068	1.17154e-05	0.000494679
eif4g2a	1.86584	0.899826	0.000153033	0.00419318
taldo1	2.90586	1.53897	6.53063e-10	8.8796e-08
hn1b	1.77779	0.830087	0.000483102	0.0101994
CABZ01040055.1	54.7335	5.77435	1.13073e-58	8.14844e-55
arpc3	2.46014	1.29874	1.49045e-07	1.16747e-05
bzw1a	1.64285	0.7162	0.00393051	0.0498379
htra1b	3.05683	1.61204	6.07675e-07	3.99311e-05
capza1a	1.6889	0.75608	0.00290552	0.0398063
ACTR3 (2 of 2)	1.84073	0.880281	0.000492438	0.0103359
abce1	1.65251	0.724659	0.00218628	0.0321313
lasp1	2.06106	1.04339	1.14956e-05	0.000486347
psma1	1.70723	0.771653	0.00252565	0.0359461
psmc3	2.32528	1.21741	6.66118e-07	4.31293e-05
ewsr1a	1.80221	0.849764	0.000227702	0.0057374
BX296557.6	3.76481	1.91258	4.47568e-10	6.32416e-08
2015-09-01	1.77606	0.828678	0.000703545	0.0136535
dynll1	3.24686	1.69904	3.83237e-11	6.79115e-09
arpc1b	3.93198	1.97525	5.25424e-14	1.79586e-11
tgm2b	3.32429	1.73305	7.30459e-12	1.50398e-09
hnrpl	2.03263	1.02335	5.31539e-05	0.00173062
sars	2.54881	1.34982	3.46312e-08	3.15904e-06
txndc5	1.75739	0.813434	0.000992084	0.0177507
kdelr2a	1.73132	0.791872	0.000767634	0.0145065
pcna	2.37547	1.24821	1.03335e-06	6.22283e-05
psmc4	1.89984	0.925875	0.000125556	0.00355753
pls3	2.489	1.31557	1.96077e-06	0.000108972
col6a1	1.67521	0.744339	0.00233364	0.0339052
psmb3	1.85982	0.895167	0.000368869	0.00833289
zgc:123194	10.9355	3.45095	1.56632e-32	5.64371e-29
tuba8l3	2.45274	1.29439	0.000697282	0.0135441
arf5	2.79835	1.48458	4.95762e-09	5.52468e-07
rpn2	2.03596	1.02571	2.73021e-05	0.00100382
ptrfb	2.5615	1.35699	2.00815e-08	1.98239e-06
thbs1b	1.76979	0.823581	0.00067202	0.0132872
psmb5	1.90944	0.933149	0.000179657	0.00481885
rhoae	2.97189	1.57138	0.000161605	0.00438361
npc2	1.86441	0.898723	0.000366179	0.00830585
snx12	1.79557	0.844445	0.000467253	0.0099327
dync1li2	1.59133	0.670232	0.00365926	0.0474563
gnai2a	2.81034	1.49074	3.09425e-09	3.69583e-07
sele	3.01027	1.58989	6.27031e-05	0.0019935
psme1	2.32117	1.21485	9.53099e-07	5.83713e-05
psmd12	1.78684	0.837414	0.000680285	0.0133667
junba	3.33349	1.73703	1.95058e-08	1.9433e-06
psmd3	1.83309	0.874278	0.000549337	0.0112891
vasp	2.24357	1.16579	3.79227e-06	0.000191108
abcf1	2.28652	1.19315	1.21387e-06	7.17011e-05
psmd7	1.66489	0.735425	0.00182879	0.0281199
psmc6	1.94258	0.957974	0.000253534	0.00623566
ddx39ab	2.10012	1.07047	3.40764e-05	0.00120375
lcp1	5.35268	2.42026	5.54957e-10	7.64179e-08
grina	1.77752	0.829867	0.00112383	0.0194159
fbl	2.05562	1.03957	2.64446e-05	0.000977275
psmd8	2.2695	1.18238	2.14577e-06	0.000117442
SBNO2 (2 of 2)	2.74563	1.45714	3.88131e-06	0.000194236
actn1	5.42364	2.43926	2.63913e-19	2.28222e-16
zgc:112242	2.92457	1.54822	0.000343328	0.00791525
ube2na	2.25357	1.17221	1.60058e-06	9.15419e-05
ckba	5.5535	2.4734	1.16089e-20	1.25486e-17
ddx39aa	1.72037	0.782723	0.00196752	0.0297246
BX537263.9	3.51414	1.81317	4.37748e-11	7.632e-09
hnrnpl2	1.772	0.825378	0.000981362	0.0176067
ednraa	1.66381	0.734494	0.00378986	0.0485697
BX537263.10	3.21919	1.6867	4.5751e-10	6.42267e-08
BX296557.1	3.54357	1.82521	1.40818e-11	2.67048e-09
atp2a2b	1.97232	0.979895	8.1439e-05	0.00249028
lmna	2.97273	1.57179	0.000124146	0.00352683
pdip5	2.88883	1.53049	3.78945e-09	4.33478e-07
atp6v1ba	3.29366	1.71969	7.68951e-11	1.30897e-08
psma4	1.90239	0.927815	0.000196308	0.00512559
ptp4a1	1.79106	0.84081	0.00204866	0.0305658
ywhae2	2.15665	1.10879	5.05535e-05	0.00166858
pgd	3.39196	1.76212	3.52673e-09	4.09916e-07
prkcsh	2.13354	1.09325	1.23976e-05	0.00051742
lims1	1.83789	0.878054	0.000334376	0.00778975
si:ch73-303g23.4	2.57784	1.36616	0.00350234	0.0458916
psmc1a	1.70572	0.770381	0.00213872	0.0316475
id1	2.56753	1.36038	4.45412e-07	3.08634e-05
s100v2	2.14956	1.10404	0.000610021	0.0123253
efemp2b	1.65623	0.727905	0.00392108	0.049806
ube2d2l	1.77725	0.829644	0.00136304	0.0223918
psmd13	1.71309	0.776603	0.00318578	0.0425407
tubb6	2.07761	1.05493	0.000352207	0.00804051
rac1a	2.54691	1.34875	1.12625e-07	9.22289e-06
snx5	2.62667	1.39323	4.67004e-08	4.1548e-06
pdlim1	2.28734	1.19367	2.6629e-05	0.00098241
arhgdig	3.64969	1.86777	2.24917e-12	5.34339e-10
lygl1	8.26197	3.04649	3.54896e-07	2.549e-05
rab8b	1.80635	0.85308	0.00102329	0.0182078
psmd4a	1.8047	0.851756	0.000470985	0.00998258
odc1	17.5498	4.13338	7.79818e-09	8.22834e-07
cmpk	2.14714	1.10242	9.11144e-05	0.00274346
coro1ca	3.04831	1.60801	9.41183e-10	1.23318e-07
pdia4	4.56132	2.18945	1.36413e-15	6.55358e-13
nsfl1c	1.89255	0.920329	0.000352801	0.00804559
BX537263.8	3.56404	1.83351	3.42007e-09	4.0184e-07
cox6a1	2.8139	1.49257	2.5977e-08	2.474e-06
coro1a	6.42366	2.6834	6.18128e-13	1.69156e-10
BX537263.5	3.51633	1.81407	6.47856e-08	5.53597e-06
psmd14	1.9882	0.991463	0.000243155	0.00602883
grn1	47.5398	5.57106	4.79361e-15	2.03202e-12
CABZ01103847.1	1.9242	0.94426	0.000452066	0.00969566
CABZ01045618.2	3.60148	1.84859	3.01696e-10	4.40701e-08
ctsz	5.15393	2.36567	1.62241e-16	8.76871e-14
CLUH (3 of 3)	2.00604	1.00435	0.000181127	0.0048464
rras	2.16052	1.11138	1.64923e-05	0.000661497
h2afvb	2.26135	1.17719	1.05686e-05	0.000456965
POR (2 of 2)	2.68231	1.42348	0.000182134	0.00486718
mmp13a	132.879	7.05397	1.61795e-05	0.000652583
si:ch211-198c19.3	8.43192	3.07586	2.37612e-06	0.000128745
sar1b	1.87084	0.903689	0.000345733	0.0079515
arf1	2.33564	1.22382	0.000234658	0.00589206
si:rp71-45k5.4	1.9548	0.967022	0.000449787	0.00965634
itgav	2.66698	1.41521	3.8609e-05	0.00133979
clic1	2.42615	1.27867	5.96023e-07	3.92848e-05
zgc:77086	1.70826	0.77253	0.00348939	0.0458027
zgc:152830	2.45704	1.29692	0.00043036	0.009379
anxa5b	8.58444	3.10172	1.59488e-24	2.29864e-21
sri	2.69326	1.42935	1.46677e-07	1.15309e-05
arpc4l	2.60419	1.38084	1.3992e-07	1.10399e-05
zgc:92880	8.37262	3.06568	5.41422e-05	0.0017552
ptbp1a	1.86424	0.898587	0.000710348	0.0137239
sh3bgrl3	1.99934	0.999524	0.000121909	0.00348618
c3a	87.7236	6.45489	1.07411e-07	8.82939e-06
ap2s1	2.24245	1.16508	5.42995e-06	0.000260173
LAMA3 (1 of 2)	344.151	8.4269	4.7264e-20	4.64455e-17
BX537263.4	4.30589	2.10631	2.25711e-08	2.20798e-06
ARF5 (1 of 2)	1.78528	0.836152	0.000980018	0.0175972
actr2a	5.04478	2.33479	5.64211e-16	2.83667e-13
pcolce2b	2.81806	1.4947	2.49281e-08	2.39521e-06
CT956064.1	3.51757	1.81458	1.19686e-05	0.000503401
rbms3	1.76812	0.822219	0.00104581	0.0184831
cxcl-c1c	4.54084	2.18296	1.6093e-12	4.04551e-10
si:ch1073-392o20.2	2.54688	1.34873	4.59482e-05	0.00153059
myh9a	10.008	3.32308	1.1296e-25	2.03507e-22
CT956064.7	4.33664	2.11658	1.84844e-13	5.62836e-11
BX537263.2	4.11702	2.0416	1.8338e-12	4.4545e-10
ctsh	1.89415	0.921549	0.000741424	0.0141348
degs1	1.87316	0.905477	0.000562965	0.0115472
sec11a	2.15628	1.10854	4.1461e-05	0.00141591
EIF1B	1.87124	0.903993	0.000648677	0.0129132
pkp1b	43.294	5.4361	1.14425e-06	6.79602e-05
zgc:55558	1.86569	0.899708	0.000531969	0.0110054
rbb4l	1.82495	0.867857	0.00112149	0.0193964
psme2	1.86233	0.897106	0.000519882	0.0108175
cyb5a	1.8508	0.888145	0.00116962	0.019989
dad1	3.04784	1.60779	7.80244e-09	8.22834e-07
BX296557.3	3.78426	1.92001	6.15891e-09	6.72472e-07
tars	2.30885	1.20717	5.03875e-06	0.000243154
atp6ap1b	1.89731	0.923952	0.000815551	0.0152521
stat3	2.35536	1.23595	9.91367e-06	0.000432977
nucb1	2.42308	1.27684	1.52162e-05	0.000616255
hmox1a	2.65415	1.40825	0.000826519	0.0153642
rdh10b	2.5348	1.34187	1.09343e-06	6.51211e-05
adam8a	151.369	7.24192	4.6337e-34	2.1527e-30
ostc	3.12799	1.64523	1.39606e-09	1.79651e-07
clta	2.67099	1.41738	1.3544e-07	1.07256e-05
arpc4	2.78415	1.47724	1.23099e-07	9.89326e-06
smarca4	2.37126	1.24565	3.3908e-06	0.00017371
arpc5a	5.70659	2.51263	6.28945e-12	1.30742e-09
glrx	2.34418	1.22909	9.29454e-06	0.000410079
grna	3.86881	1.95189	1.7361e-09	2.18213e-07
tram1	2.31685	1.21217	7.8147e-06	0.000352636
calm3b	2.32941	1.21996	2.16829e-05	0.000828203
scpep1	2.74857	1.45868	8.98783e-08	7.50224e-06
psma2	2.16746	1.11601	5.43535e-05	0.00175645
hnrnph1l	2.42649	1.27887	2.70092e-06	0.00014331
txnl1	1.73727	0.796824	0.00299953	0.0407074
gmppb	2.2683	1.18161	1.7458e-05	0.000693794
psmb8	3.44934	1.78632	2.41533e-10	3.65154e-08
CABZ01045617.1	3.58088	1.84031	7.58179e-07	4.77874e-05
ptgs2a	10.5802	3.4033	1.32133e-11	2.55052e-09
ctrb1	2.87559	1.52386	5.86446e-06	0.000276218
yars	2.44749	1.2913	4.45454e-06	0.000218373
adam8b	4.59816	2.20106	7.86209e-06	0.000352636
cfl1l	10.6841	3.41739	9.53582e-15	3.68134e-12
atl3	2.09451	1.06661	8.03222e-05	0.0024631
sgpl1	1.94787	0.9619	0.000443667	0.00956609
nck1b	1.78229	0.833732	0.00184687	0.0282973
calua	4.64103	2.21444	1.26462e-14	4.79645e-12
cebpa	3.82236	1.93446	1.59696e-10	2.50178e-08
ptges3b	4.4297	2.14721	1.06671e-13	3.39135e-11
adam9	2.59534	1.37592	6.12534e-07	4.01284e-05
CABZ01112358.1	2.40302	1.26485	3.12442e-06	0.000162372
colec12	6.45713	2.69089	2.91433e-10	4.28605e-08
scarb2	3.30348	1.72399	7.8512e-06	0.000352636
ehd1a	2.74232	1.4554	0.000444535	0.00956609
lgals3bpb	12.4164	3.63417	1.25174e-09	1.62044e-07
BDP1 (1 of 2)	3.66889	1.87534	1.77992e-07	1.36454e-05
sb:cb252	35.8701	5.16471	5.41523e-05	0.0017552
tax1bp3	2.12635	1.08838	0.00189173	0.0289027
hyou1	3.18984	1.67348	2.16288e-09	2.68732e-07
slco2b1	2.42809	1.27982	0.00030348	0.0072257
hm13	2.11998	1.08405	6.05572e-05	0.00193381
C13H10orf54	2.99036	1.58032	0.000592805	0.0120224
DBNDD2	1.78031	0.832129	0.00120237	0.0204196
psmd4b	1.94327	0.958485	0.000421373	0.00922965
txn	21.5871	4.4321	4.97873e-34	2.1527e-30
dynlrb1	1.83664	0.877065	0.00140055	0.0227486
ywhah	1.93047	0.948951	0.000720072	0.0138499
snrpd2	2.33395	1.22277	7.82603e-06	0.000352636
slc43a3b	2.1812	1.12512	9.9819e-05	0.00295615
nop58	1.75222	0.809186	0.00324543	0.0431773
rcc2	2.09367	1.06603	0.000219615	0.00554656
usp14	2.21084	1.14459	6.78481e-05	0.00212799
gmfb	2.54493	1.34762	1.98395e-06	0.000109977
CT583728.14	4.14892	2.05273	3.7896e-09	4.33478e-07
galnt7	1.77126	0.824773	0.00381498	0.0488313
marco	7.34792	2.87734	3.26277e-19	2.61251e-16
hapln1a	2.28222	1.19044	9.71974e-06	0.000426229
bmp1a	2.2413	1.16433	0.000707988	0.0137028
pak2a	2.16744	1.11599	9.06554e-05	0.00273344
rnaseka	1.80391	0.851131	0.00256851	0.0363646
CT583728.11	3.99176	1.99702	5.71058e-08	4.95062e-06
zgc:103438	3.95276	1.98286	8.29604e-11	1.37963e-08
fkbp9	3.37655	1.75555	2.98834e-09	3.6111e-07
cndp2	4.82999	2.27202	3.36222e-14	1.17239e-11
lypla2	1.95805	0.969416	0.000319314	0.0075363
srrt	1.84443	0.883179	0.00107125	0.0187525
qars	2.13312	1.09297	0.00020082	0.00519917
BX537263.12	5.69074	2.50862	5.01802e-15	2.08624e-12
ifi30	1.7924	0.841891	0.00360489	0.04692
ccl25b	2.31469	1.21082	1.42141e-05	0.000580896
MYOF	14.466	3.8546	1.95794e-11	3.61784e-09
zgc:92326	2.54147	1.34566	2.11292e-06	0.000116528
TCIRG1 (2 of 2)	4.50038	2.17005	1.9045e-12	4.57482e-10
ndrg1a	3.19992	1.67804	7.44872e-05	0.00232037
atp6v1aa	3.14061	1.65105	6.33957e-07	4.14064e-05
BX548011.1	5.24583	2.39117	4.45556e-10	6.32416e-08
cfp	8.1241	3.02221	5.5998e-20	5.26356e-17
plod2	2.75657	1.46287	4.76515e-07	3.26006e-05
GANAB (3 of 3)	1.97599	0.982573	0.000725947	0.013901
oaz2b	2.58665	1.37109	1.70213e-06	9.6331e-05
si:ch211-5k11.6	18.3001	4.19378	0.000204803	0.00526472
gsr	1.90652	0.930943	0.00254894	0.0361584
TOMM6	1.88676	0.915911	0.00107945	0.0188171
BX537263.11	3.16574	1.66254	1.52218e-05	0.000616255
capgb	12.8319	3.68166	1.40497e-12	3.65953e-10
dpp3	3.57846	1.83934	4.63142e-09	5.18791e-07
csrp1a	1.97466	0.981603	0.000449534	0.00965634
scinlb	7.26656	2.86127	0.00161395	0.02545
kdelr2b	2.91672	1.54434	3.22859e-07	2.3538e-05
ncl1	3.21871	1.68648	1.47706e-08	1.5102e-06
CT583728.19	3.57488	1.83789	1.56937e-09	1.99578e-07
ackr3b	2.32677	1.21833	0.000951941	0.0172218
smarca5	2.86877	1.52043	1.25999e-07	1.00644e-05
zgc:63637	1.76977	0.823564	0.00232799	0.0338625
fkbp2	3.21714	1.68578	6.72127e-09	7.22921e-07
PARP4	2.11914	1.08348	0.000278268	0.00674903
blmh	2.04818	1.03434	0.000444178	0.00956609
thop1	2.22915	1.15649	4.40027e-05	0.00148381
CABZ01064941.1	2.424	1.27739	1.08996e-05	0.000467539
LAMB3	91.8625	6.5214	0.000142	0.00393073
epcam	312.644	8.28838	2.49631e-06	0.000133915
wdr5	1.9083	0.932286	0.00132579	0.0218795
zmpste24	2.75529	1.4622	2.0014e-06	0.00011066
ptp4a2a	1.91834	0.939862	0.000924414	0.0167518
vps25	1.85965	0.895033	0.00256679	0.036364
f13a1b	4.41875	2.14364	7.84557e-11	1.3251e-08
atp6v1c1a	1.81902	0.86316	0.00269405	0.0375034
OLFM4 (3 of 8)	22.0679	4.46388	5.17187e-07	3.50504e-05
snrpe	2.35699	1.23695	6.55219e-05	0.00207008
cybb	6.73426	2.75152	0.000120998	0.00346932
CR936442.1	1.88765	0.916594	0.00389362	0.0495764
cldni	32.9805	5.04354	5.9666e-13	1.65374e-10
CT956064.6	4.19736	2.06948	1.12642e-10	1.85893e-08
acsl4l	8.26864	3.04765	3.23264e-08	2.99942e-06
mmp14a	2.49364	1.31825	0.000117931	0.00339939
ddx19	2.30109	1.20232	2.9438e-05	0.00106247
gar1	2.18382	1.12686	0.00014347	0.00396635
dhrs3a	3.78144	1.91894	7.16768e-06	0.000326772
RIN3	2.40757	1.26758	1.502e-05	0.00061152
OLFM4 (5 of 8)	8.93765	3.1599	0.000792072	0.0148773
si:ch211-71m22.1	4.31608	2.10972	2.76143e-05	0.00101357
sptlc2b	4.04939	2.0177	0.00241196	0.0348092
pitpnaa	4.54589	2.18456	3.61776e-12	7.92721e-10
lmf2b	2.54177	1.34583	8.26258e-06	0.000368706
ano5b	2.05362	1.03817	0.00115944	0.0198778
cd82b	2.3132	1.20989	9.18657e-05	0.00276223
eif4e1c	3.05427	1.61083	6.05814e-06	0.000284102
SNRPG	3.09078	1.62797	4.09831e-05	0.00140637
si:ch211-105c13.3	6.54405	2.71018	6.23081e-15	2.49452e-12
cpn1	2.38594	1.25456	3.19381e-05	0.0011416
f2r	1.83681	0.877206	0.0020371	0.0304775
lta4h	2.40212	1.26431	0.00215914	0.0318189
zgc:56530	1.98893	0.991992	0.000625135	0.0125533
vmp1	4.0405	2.01453	1.31686e-10	2.14053e-08
TSG101 (1 of 5)	1.93486	0.952228	0.00130054	0.0215781
itga6b	11.0486	3.4658	1.26806e-11	2.46974e-09
aqp1a.1	1.87179	0.904422	0.00358067	0.0466329
asph	3.52695	1.81842	2.43468e-05	0.000910647
dnajb11	3.83886	1.94068	3.50512e-07	2.5259e-05
mtap	2.15343	1.10664	0.000150936	0.00414622
serpinh1a	5.95284	2.57358	3.57829e-15	1.57876e-12
nomo	2.13248	1.09253	0.0002933	0.00702199
rhogb	3.32273	1.73237	2.60455e-06	0.000139376
gnl3	2.36136	1.23962	7.56625e-05	0.00234684
nfkbiaa	2.28697	1.19344	0.00125345	0.0210358
vwa1	3.97896	1.99239	2.05462e-09	2.56756e-07
snrpd1	2.82	1.49569	1.78253e-06	0.000100356
rnps1	2.0125	1.00899	0.00102607	0.0182422
zgc:91909	1.79808	0.84646	0.00366518	0.047476
sumo3b	1.81476	0.85978	0.00357413	0.0466038
zgc:85975	4.06678	2.02389	1.27715e-05	0.000527929
atp6v1e1b	2.21971	1.15037	0.000160698	0.00436984
cers2b	4.68967	2.22949	3.21304e-12	7.31188e-10
ap1s1	4.06367	2.02278	2.07884e-10	3.23326e-08
ctssb.1	5.67184	2.50382	7.62172e-14	2.45931e-11
si:dkey-238c7.16	4.04372	2.01568	1.4311e-10	2.27493e-08
plk3	2.15963	1.11078	0.000200767	0.00519917
scinla	2.55691	1.3544	1.09359e-05	0.000468164
si:dkey-32n7.4	2.32755	1.21881	0.00302892	0.0409264
si:ch211-195m9.3	3.52928	1.81937	1.82824e-08	1.82985e-06
stxbp2	2.25611	1.17384	0.000271444	0.00660849
fhl3a	2.86828	1.52019	7.75292e-07	4.85827e-05
actl6a	2.07617	1.05392	0.000499756	0.0104591
scamp4	3.20404	1.67989	4.65529e-08	4.1548e-06
mapkapk3	2.29687	1.19967	0.000317069	0.0074997
dkc1	2.277	1.18713	0.000395239	0.0087925
dkk3b	2.60647	1.3821	6.6966e-05	0.00210841
casp3a	2.68755	1.42629	7.85006e-06	0.000352636
gng12a	1.97612	0.982672	0.00137183	0.0224508
adamts1	4.00601	2.00217	2.10236e-07	1.58919e-05
dapk3	1.89966	0.925744	0.0018166	0.0279723
olfml3b	4.96428	2.31158	3.52029e-12	7.84588e-10
atf6	2.34284	1.22826	4.84383e-05	0.00160612
wipf1	1.99225	0.994396	0.00254859	0.0361584
col12a1b	244.912	7.93612	6.2543e-25	1.04009e-21
cd276	3.1014	1.63292	4.4178e-07	3.07101e-05
hk2	41.4101	5.37191	9.03858e-28	2.17117e-24
cyba	6.88085	2.78259	2.46071e-15	1.15648e-12
g6pd	3.73366	1.90059	4.69605e-07	3.22298e-05
rrbp1a	3.72739	1.89817	3.29454e-09	3.89206e-07
s100u	2.57712	1.36576	0.00138175	0.022545
cldnb	25.0634	4.64751	3.06882e-09	3.68583e-07
tnfaip6	11.3024	3.49856	2.12293e-20	2.18551e-17
myh11a	2.40912	1.26851	2.54468e-05	0.000945248
calrl2	3.01328	1.59134	6.6909e-07	4.31793e-05
C23H20orf24	2.29444	1.19814	0.00067238	0.0132872
ptbp3	2.04672	1.03331	0.000829798	0.0154119
si:dkey-25e12.3	8.31795	3.05623	2.86831e-08	2.69217e-06
ctnnbip1	2.08077	1.05712	0.000586588	0.0119226
chst1	2.41757	1.27356	2.91463e-05	0.00105724
mrc1b	6.39295	2.67648	1.14349e-07	9.32871e-06
sulf2b	2.08558	1.06045	0.000974629	0.017533
h2afva	2.37256	1.24645	7.63117e-05	0.00236359
alg5	2.26155	1.17731	0.000499538	0.0104591
prkri	2.40676	1.26709	4.63732e-05	0.00154237
c1qb	4.51855	2.17586	8.92876e-09	9.32516e-07
MDP1	3.29818	1.72167	1.18893e-07	9.62678e-06
dram1	2.31892	1.21346	0.000235191	0.00589387
mpeg1	2.79139	1.48099	0.00135847	0.0223507
rac2	6.50314	2.70114	5.08431e-05	0.00167557
ltbp1	2.39692	1.26118	0.00013068	0.0036786
pdap1a	3.65448	1.86967	1.88803e-07	1.44231e-05
slc39a7	4.77019	2.25405	4.09557e-11	7.19855e-09
fkbp7	5.08552	2.3464	4.77005e-12	1.02103e-09
si:dkey-5n18.1	5.41742	2.4376	9.75069e-12	1.97009e-09
tgfb1b	1.9489	0.962659	0.00264539	0.0369927
vcanb	6.21391	2.6355	1.21429e-05	0.000509741
cxcl12a	2.92611	1.54899	0.00292644	0.0400168
CT583728.9	3.66367	1.87329	6.85551e-06	0.000314003
NCKAP1L	3.00737	1.5885	3.51883e-06	0.000178997
si:ch211-122l24.4	37.9059	5.24435	3.25946e-16	1.71869e-13
bcl7ba	2.8875	1.52982	1.39723e-06	8.16399e-05
serp1	2.20238	1.13906	0.000591269	0.0120025
cxcl12b	3.50917	1.81113	1.53081e-08	1.54647e-06
uchl3	3.06888	1.61771	1.45247e-06	8.41851e-05
lrrc17	2.98307	1.5768	2.46556e-06	0.000132595
si:ch211-284o19.8	58.424	5.86849	3.17197e-12	7.29519e-10
AL935186.2	4.5929	2.19941	8.65093e-10	1.14739e-07
bms1l	1.86176	0.89667	0.00307401	0.0413289
ufm1	1.92422	0.944275	0.00187735	0.0287032
rcn3	13.5696	3.7623	3.16847e-09	3.76369e-07
edem1	2.83162	1.50163	1.02834e-05	0.000447316
LLPH	1.92203	0.942632	0.00302825	0.0409264
ptx3a	7.83915	2.9707	3.85031e-15	1.6648e-12
abracl	25.9567	4.69804	1.41045e-24	2.17803e-21
pdcd6	2.64081	1.40098	2.40098e-05	0.000901161
sepn1	2.38062	1.25134	0.00371081	0.0479522
lmnb1	2.14556	1.10135	0.00117382	0.0200449
ptbp1b	2.29285	1.19714	0.000196801	0.00512607
zgc:153924	2.01242	1.00893	0.00205829	0.0306884
akr1a1b	1.93252	0.950486	0.00350696	0.0459218
parp3	3.23276	1.69276	5.61057e-07	3.7207e-05
CU278559.1	3.24236	1.69704	7.03442e-07	4.51268e-05
abcc4	2.78154	1.47589	6.67549e-06	0.000306406
FAM83G (1 of 2)	1.91176	0.934905	0.00264299	0.036983
ptprfb	3.55532	1.82998	5.57474e-07	3.70832e-05
zw10	1.94125	0.956986	0.00340609	0.0449549
acp6	2.69573	1.43068	2.40944e-05	0.000902767
dsg2	17.1432	4.09956	3.07793e-21	3.69676e-18
ugdh	4.1619	2.05724	3.69278e-08	3.32643e-06
rrm1	3.07495	1.62056	2.40101e-06	0.000129513
arpc5b	5.75555	2.52495	1.40071e-11	2.67048e-09
papss2b	2.2143	1.14685	0.00204083	0.0305122
manf	3.68464	1.88152	2.78733e-08	2.63141e-06
lrpap1	5.73143	2.5189	1.61445e-06	9.20921e-05
dnmt1	3.71205	1.89222	5.60308e-08	4.88439e-06
sdr16c5b	2.10096	1.07105	0.000887663	0.016285
abcc2	2.51718	1.33181	0.00213858	0.0316475
eif4eb	2.11968	1.08385	0.0013756	0.0224785
lmnb2	2.71139	1.43903	1.62986e-05	0.000655639
emd	2.67127	1.41753	0.000774239	0.0145931
ncf1	6.08052	2.6042	1.05575e-06	6.31671e-05
pkp3a	13.3253	3.73609	6.52801e-19	5.04032e-16
plxnc1	11.5247	3.52665	4.20583e-18	2.93309e-15
MAP1S (2 of 2)	2.18465	1.1274	0.000489429	0.0102928
efhd2	7.77658	2.95914	1.8511e-14	6.78287e-12
rpa2	2.15352	1.1067	0.00152682	0.0243424
asns	2.20544	1.14107	0.000671172	0.0132872
hnrnpc	2.06213	1.04414	0.0026036	0.036741
CD53	5.10766	2.35266	8.06966e-11	1.35239e-08
rrm2	5.8013	2.53638	2.83779e-05	0.00103807
tlr5b	3.41731	1.77286	2.41226e-07	1.79839e-05
calub	2.3417	1.22756	0.000253157	0.00623348
zgc:158446	13.9622	3.80346	0.00104641	0.0184831
ier5l	3.48604	1.80159	1.00693e-06	6.08068e-05
slc4a2b	2.62611	1.39293	0.000640412	0.012784
spaca4l	5.04684	2.33538	1.99263e-08	1.97609e-06
ostf1	3.41346	1.77123	0.00103609	0.0183902
psma6l	1.99881	0.99914	0.00317711	0.0424512
ruvbl2	3.53663	1.82237	1.66592e-07	1.28627e-05
lman1	4.29791	2.10364	2.69558e-09	3.29241e-07
cyp1c2	2.53219	1.34038	3.36899e-05	0.00119205
mcfd2	2.91647	1.54422	2.88979e-05	0.00104999
itgb4	4.42207	2.14472	5.29587e-08	4.63528e-06
lect2l	6.06789	2.60119	8.9426e-05	0.00270392
zgc:153129	2.04171	1.02978	0.00231764	0.0337408
mcm4	24.1839	4.59597	7.08113e-22	9.00512e-19
cd9b	13.637	3.76946	8.72472e-05	0.00264173
tpte	2.09595	1.0676	0.00128387	0.0213507
ptprc	3.95966	1.98538	0.00209092	0.0310677
acsl3b	1.96775	0.976543	0.00313001	0.0418995
uap1	2.4865	1.31411	0.000100349	0.00296371
SNX2	2.24437	1.16631	0.000584823	0.0119052
atp6v1ab	6.44383	2.68792	1.76186e-12	4.32837e-10
mlec	3.02703	1.5979	0.000190958	0.00502229
dnajc3	2.86737	1.51973	1.78561e-05	0.000705722
TPM1	2.47866	1.30956	0.00037756	0.00850257
zgc:123010	2.16299	1.11303	0.000807687	0.0151312
dbn1	4.28928	2.10074	2.18877e-05	0.000834549
sulf1	4.69505	2.23114	2.40957e-07	1.79839e-05
flnbl	3.37416	1.75453	6.50756e-07	4.23756e-05
tnc	33.282	5.05667	6.83301e-23	9.23268e-20
efnb2a	2.5749	1.36451	0.000133331	0.00373864
ca2	33.693	5.07438	2.88297e-06	0.000151647
pnp5a	4.89542	2.29143	4.69036e-07	3.22298e-05
C1S (3 of 3)	5.16888	2.36985	8.75189e-10	1.1537e-07
mfap4	21.1456	4.40228	9.88184e-05	0.00293455
stim1a	2.54825	1.34951	0.000106123	0.00309618
sult2st3	2.67345	1.41871	2.88528e-05	0.00104999
CABZ01066772.1	3.53028	1.81978	3.83159e-07	2.72484e-05
dnajc5ab	2.25135	1.17079	0.000823816	0.0153271
CU651569.3	3.27697	1.71236	2.91355e-06	0.000152839
cyp26b1	2.09711	1.0684	0.0035498	0.0463145
ms4a17a.11	2.30204	1.20291	0.000691016	0.0134708
aqp3a	6.19151	2.63029	1.63159e-05	0.000655639
smim15	3.01356	1.59147	1.13475e-05	0.00048197
dram2b	2.25198	1.17119	0.00137128	0.0224508
txnl4a	2.13662	1.09533	0.00208691	0.0310295
myof	15.9483	3.99533	7.78832e-18	5.26174e-15
slc7a3a	4.59336	2.19955	4.04761e-09	4.58143e-07
CU019646.2	2.75145	1.46019	5.68409e-05	0.00182592
nup210	3.85459	1.94658	5.26168e-06	0.000253346
sdf2l1	3.99275	1.99738	3.67073e-08	3.32039e-06
ugt1b5	1.92328	0.943568	0.00325975	0.0432736
SLC25A24	3.07677	1.62142	0.000643932	0.0128306
fam20b	2.44012	1.28695	0.000491985	0.0103359
si:ch211-137i24.10	3.71361	1.89282	8.38461e-08	7.05318e-06
uggt2	2.22308	1.15256	0.000999108	0.0178363
lmo2	2.16742	1.11598	0.00263158	0.0369356
si:ch1073-228p2.2	2.37378	1.24719	0.00369395	0.0477914
dhrs13a.1	3.71343	1.89275	3.94179e-07	2.79402e-05
gbp1	7.64723	2.93494	4.03887e-07	2.83495e-05
BCR (1 of 2)	2.77246	1.47117	0.00276722	0.0382754
CT027569.1	5.57405	2.47873	6.71823e-07	4.32266e-05
spag1a	3.34574	1.74232	8.62197e-05	0.00261428
si:dkey-228a15.1	2.77167	1.47075	3.6215e-05	0.00126688
tes	3.28044	1.71389	4.2971e-06	0.000212098
frem2b	2.05852	1.0416	0.0019844	0.0299169
dnajc10	2.47264	1.30605	0.00032086	0.00756454
mcm2	16.8031	4.07066	2.25093e-17	1.43126e-14
nhp2l1b	2.5346	1.34176	0.000285497	0.00687324
f11r	2.79539	1.48305	4.53229e-05	0.00151443
snai2	6.77413	2.76004	0.000586783	0.0119226
lifrb	21.1078	4.3997	9.72988e-13	2.59692e-10
sephs1	2.13389	1.09348	0.00175925	0.0272054
tubb5	22.9173	4.51836	1.71128e-19	1.54151e-16
sypl2b	2.19735	1.13576	0.000989928	0.0177309
si:dkey-7o6.3	6.10507	2.61001	1.51913e-10	2.39723e-08
BX296557.5	3.70619	1.88994	1.22298e-06	7.20428e-05
spint1a	19.4859	4.28436	5.47626e-12	1.1607e-09
psmb11	2.53435	1.34162	0.000228796	0.00575826
agr2	26.6934	4.73841	1.43838e-06	8.35921e-05
naga	2.30023	1.20178	0.00133003	0.0219328
mrto4	3.16757	1.66337	2.67732e-05	0.000986048
c1qa	3.27415	1.71112	9.14908e-06	0.000404487
hmgcs1	2.20363	1.13988	0.00103189	0.0183307
cldn5b	2.56724	1.36022	0.000391313	0.00875538
has1	27.2255	4.76688	3.12644e-19	2.59964e-16
dhrs12	1.98917	0.992169	0.00354505	0.046298
BX548011.3	2.50747	1.32623	0.000402376	0.00888556
cars	2.40485	1.26595	0.000605578	0.012247
si:ch211-9d9.1	6.42859	2.6845	1.12661e-05	0.000480399
cdh1	5.59708	2.48467	6.87593e-09	7.35895e-07
si:dkey-102g19.3	22.7084	4.50516	5.18541e-15	2.11516e-12
tmem204	2.72615	1.44686	0.00088811	0.016285
rasl11a	2.46725	1.3029	0.000819865	0.0152931
derl2	2.03727	1.02664	0.00305124	0.0410484
hmha1	4.45195	2.15444	9.10328e-08	7.54038e-06
CFP (1 of 2)	2.95309	1.56223	0.0018415	0.028235
si:ch73-22o12.1	3.95266	1.98282	5.48611e-07	3.67196e-05
csf1ra	3.11121	1.63747	0.000574701	0.0117517
tmed1b	2.38716	1.25529	0.000987908	0.0177094
rcn1	2.10183	1.07164	0.00315468	0.0422035
grap2b	2.93372	1.55273	0.00156855	0.0248611
ptpn6	5.91689	2.56484	6.80451e-08	5.79161e-06
RBM47	7.05214	2.81806	6.00956e-11	1.03937e-08
lgals9l1	13.0406	3.70494	0.00392722	0.0498254
muc5b	22.982	4.52243	2.84343e-13	8.19627e-11
eml3	2.85458	1.51328	0.000260142	0.00636921
LSP1	62.3483	5.96228	6.80933e-14	2.23047e-11
nop2	4.39363	2.13541	4.06797e-05	0.00139818
ccdc43	2.37048	1.24518	0.000540406	0.0111373
gcga	65.686	6.03752	7.17964e-06	0.000326772
impa1	3.80082	1.92631	1.69924e-06	9.6331e-05
slc31a1	2.47278	1.30614	0.000631468	0.0126405
slc30a7	2.40439	1.26567	0.0037881	0.0485697
mcm6	20.0882	4.32828	1.17586e-16	6.68972e-14
mesdc2	2.57254	1.36319	0.0028409	0.0391443
ssrp1a	3.43884	1.78192	0.00105955	0.0186383
mid1ip1b	2.7383	1.45328	0.0037899	0.0485697
ptges	3.65238	1.86884	3.81888e-06	0.000191555
adam28	31.18	4.96255	1.04674e-05	0.000453495
dock8	4.32889	2.114	4.63721e-07	3.20294e-05
mpdu1b	2.31427	1.21056	0.0017091	0.0266974
lipg	7.28483	2.8649	2.34692e-11	4.29984e-09
cdk8	2.34526	1.22975	0.00129108	0.0214376
lrrc8da	2.21872	1.14972	0.00148796	0.0238991
BX284638.2	4.859	2.28066	2.74708e-08	2.60479e-06
ctssb.2	2.69128	1.42829	0.000433807	0.00942561
zgc:162200	2.43572	1.28435	0.000386758	0.00870065
nudcd2	2.1055	1.07417	0.00281427	0.0388517
si:ch211-11k18.4	9.51338	3.24996	2.7411e-12	6.44128e-10
snrpf	2.7267	1.44715	0.000913893	0.0166169
ifi35	2.21095	1.14466	0.00216752	0.0318991
cmtm6	3.59109	1.84442	0.000693539	0.0134861
zgc:56095	2.26689	1.18071	0.00219186	0.0321915
tmed3	2.61704	1.38794	0.00106705	0.0187246
BX537263.3	3.91287	1.96823	3.40054e-06	0.000173798
si:ch211-264f5.2	34.7077	5.11719	1.74037e-12	4.32472e-10
si:dkey-184p9.7	4.3144	2.10916	0.0022912	0.0334233
cd44a	26.2387	4.71362	3.29854e-17	2.03746e-14
trabd	2.84808	1.50999	0.000110302	0.00320945
tomm40l	2.55216	1.35172	0.00037317	0.00841246
si:ch211-183d21.1	2.49001	1.31615	0.000653761	0.0129905
gpt2l	2.21821	1.1494	0.00244826	0.0351687
pelo	9.73906	3.28378	3.48946e-12	7.84588e-10
rps6kb1a	2.3159	1.21157	0.0013944	0.0226659
moxd1	55.588	5.7967	2.27267e-07	1.71195e-05
cdk7	2.99343	1.5818	0.0001001	0.00296043
man1a1	2.81392	1.49258	8.5128e-05	0.00258844
BX296557.2	2.54783	1.34927	0.00116479	0.0199379
fkbp10b	7.96081	2.99291	1.17141e-07	9.52056e-06
myo1f	5.95936	2.57516	4.50882e-06	0.000220534
prdx1	9.45503	3.24108	6.04887e-12	1.26962e-09
CHST15	2.59108	1.37355	0.00057817	0.0117919
prkcdb	4.06922	2.02475	1.81047e-06	0.000101401
eny2	2.48778	1.31486	0.00151115	0.024146
fam65b	3.06806	1.61733	6.72057e-05	0.0021118
mcm3	12.4362	3.63647	1.42172e-13	4.39089e-11
mbpb	2.95779	1.56452	0.000181132	0.0048464
BX537263.1	3.66914	1.87544	9.48969e-06	0.000417836
mapre1a	5.18449	2.3742	0.000454161	0.00971167
si:ch73-248e21.7	3.37111	1.75322	2.85585e-05	0.00104292
mogs	6.75769	2.75653	3.90177e-10	5.58625e-08
ccm2	2.86967	1.52089	0.000183315	0.00487466
unc45a	2.52715	1.33751	0.00162613	0.0255861
dnase2	3.23523	1.69387	4.22527e-05	0.00143401
GANAB (2 of 3)	2.47927	1.30992	0.00112525	0.0194159
gas1a	2.4789	1.3097	0.00167189	0.0262107
spi1a	3.30461	1.72448	4.1523e-05	0.00141591
zgc:114174	2.44035	1.28709	0.00246448	0.0352845
ykt6	2.44966	1.29258	0.000896284	0.0163793
slc7a7	9.66445	3.27269	1.05361e-11	2.08973e-09
fam129bb	2.73197	1.44994	0.000435393	0.00945056
shmt1	2.9014	1.53675	0.000199968	0.00519304
calm2a	2.98341	1.57696	0.000145898	0.00402318
CT956064.2	4.16818	2.05942	1.93071e-06	0.000107578
fam114a1	2.30924	1.20742	0.00216611	0.0318991
samsn1a	10.2822	3.36208	6.07738e-09	6.66938e-07
ca16b	3.35688	1.74712	1.77488e-05	0.000702769
sigmar1	2.67895	1.42167	0.000340366	0.00787835
nid2a	3.49453	1.8051	1.79715e-05	0.000707698
stat1b	3.36073	1.74877	1.81557e-05	0.000712355
ikbke	2.46821	1.30347	0.00112531	0.0194159
cldn7b	23.1119	4.53056	2.18512e-06	0.000119293
cyb5b	3.0011	1.58549	0.00018302	0.0048728
mboat7	3.49272	1.80435	3.25689e-05	0.00115998
rnaset2	3.01519	1.59225	5.49757e-05	0.00177391
gale	26.5141	4.72869	3.4508e-16	1.77626e-13
sae1	6.50336	2.70118	2.36718e-09	2.92435e-07
parvg	4.5441	2.18399	7.75091e-07	4.85827e-05
ENDOD1 (13 of 15)	4.9574	2.30958	0.00379349	0.048585
cx43.4	2.76889	1.46931	0.00031742	0.0074998
nav3	3.75203	1.90767	3.61871e-06	0.000183645
rps6ka1	2.28263	1.1907	0.00298067	0.0405389
si:dkey-103i16.2	3.24405	1.6978	0.000964775	0.0174102
mmd	2.16408	1.11375	0.00350253	0.0458916
ABCF3	2.62401	1.39177	0.000721466	0.0138643
si:ch211-117c9.5	3.99507	1.99822	3.77481e-06	0.000190672
zgc:64065	9.77573	3.2892	5.83864e-06	0.000275602
ncf2	18.2705	4.19144	1.14159e-13	3.57681e-11
rb1	3.52319	1.81688	5.36898e-05	0.00174544
esyt1a	2.2454	1.16697	0.00197307	0.0297875
snai1a	2.52736	1.33763	0.00254033	0.0360837
si:dkey-65b12.6	11.8627	3.56836	2.74861e-11	4.99347e-09
nudc	2.97692	1.57382	0.000367599	0.00832159
C18H15orf48	3.96458	1.98717	7.43118e-06	0.00033751
ergic1	3.06824	1.61741	6.55906e-05	0.00207008
gmppab	5.27307	2.39864	5.55082e-06	0.000264324
cxcr3.2	6.09125	2.60674	8.89261e-08	7.45152e-06
enpp1	11.924	3.5758	1.71644e-11	3.22676e-09
atad5a	4.51013	2.17317	4.01224e-07	2.83466e-05
ttc27	3.80428	1.92762	0.000580286	0.0118239
ppl	7.94189	2.98948	0.00267303	0.0372828
agpat4	3.82357	1.93492	0.000102269	0.0030163
CABZ01088134.1	31.6839	4.98568	0.000907074	0.0165346
fosl1a	3.93817	1.97753	2.00482e-05	0.000773968
zgc:174904	8.29289	3.05187	6.69265e-10	9.04303e-08
plek	4.08062	2.02879	1.36921e-05	0.00056169
pmm2	6.4783	2.69561	2.35526e-08	2.28334e-06
psmb10	4.48035	2.16361	0.000263317	0.00643238
C7 (2 of 2)	4.73722	2.24404	3.92468e-05	0.00135539
slc16a6b	11.8329	3.56473	9.34967e-12	1.90689e-09
sacm1la	2.31678	1.21212	0.00387233	0.0494483
twf1b	2.8605	1.51627	0.000531609	0.0110054
elmod2	2.73771	1.45297	0.00125039	0.021004
si:busm1-57f23.1	30.7254	4.94136	1.95607e-14	6.9922e-12
rgs2	2.80426	1.48762	0.00377685	0.0485445
CABZ01045618.1	2.88303	1.52758	0.000892404	0.0163361
dusp11	3.32488	1.7333	0.000135753	0.00378688
slc16a9a	6.61924	2.72667	0.000368796	0.00833289
AL935186.6	3.35611	1.74679	0.000238322	0.00594266
zgc:92161	2.39043	1.25727	0.0027209	0.0377313
ugt5b4	2.91808	1.54502	0.000574375	0.0117517
rfc3	2.74273	1.45562	0.00154492	0.0245224
snrpb2	3.39614	1.7639	0.000206683	0.00530674
ccr9a	5.59413	2.48391	0.00299397	0.0406574
GLOD5	8.39033	3.06873	4.4228e-09	4.98002e-07
dut	6.73678	2.75206	3.29413e-08	3.03046e-06
si:dkey-96g2.2	7.53958	2.91448	7.08282e-09	7.54303e-07
MAL (2 of 3)	13.9415	3.80131	1.76803e-11	3.29509e-09
hck	10.2487	3.35737	5.25855e-10	7.28747e-08
prrx1a	3.92522	1.97277	3.05816e-05	0.00109825
srm	4.71981	2.23873	4.7002e-06	0.000228859
CABZ01073795.1	6.32817	2.66179	5.50317e-07	3.67201e-05
snrpd3	6.43736	2.68647	2.01687e-07	1.52992e-05
inhbaa	13.0722	3.70844	1.38333e-10	2.2318e-08
atp6v1c1b	2.83964	1.50571	0.000329527	0.00771
pgm2	11.4134	3.51266	1.42193e-10	2.27493e-08
fmnl1a	3.95814	1.98482	2.3909e-05	0.000898937
CT573348.1	5.00526	2.32345	0.00034084	0.00788087
CABZ01068208.1	2.92996	1.55088	0.000693677	0.0134861
wt1b	5.17432	2.37137	8.28981e-07	5.13517e-05
illr4	85.7711	6.42242	6.63535e-09	7.17248e-07
ttc39c	2.35897	1.23816	0.00317401	0.0424359
adpgk	2.68175	1.42317	0.00114996	0.0197624
chaf1a	5.58329	2.48112	4.23941e-07	2.95651e-05
tnfrsf11b	5.43437	2.44211	0.000425352	0.00928856
krt17	24.3385	4.60517	0.000236325	0.00591331
si:ch211-210c8.7	3.41927	1.77369	0.000163538	0.0044305
CABZ01068274.1	5.1151	2.35476	0.000808458	0.0151325
cldnc	2.66389	1.41353	0.000753184	0.0143085
FAM83H (1 of 2)	3.70745	1.89043	3.94493e-05	0.00135827
gdpd1	2.80381	1.48739	0.000627943	0.0125932
FYB (1 of 2)	3.76332	1.91201	0.000358085	0.00813177
kpna2	6.89767	2.78611	4.99958e-08	4.41167e-06
urod	3.03825	1.60324	0.000710238	0.0137239
cmklr1	5.04141	2.33383	0.00341774	0.0450538
fam49ba	26.8759	4.74824	1.47512e-12	3.75185e-10
spi1b	18.556	4.21381	1.52611e-06	8.77472e-05
rspo3	8.52677	3.092	2.0999e-05	0.000807788
pprc1	3.59622	1.84648	7.6742e-05	0.00237351
si:ch211-39i22.1	11.1935	3.48459	5.47631e-09	6.07141e-07
pqlc2	2.93133	1.55156	0.00131662	0.0217614
cx32.2	8.39403	3.06936	4.04493e-09	4.58143e-07
atg4da	2.69878	1.43231	0.00157693	0.0249755
arl6ip6	3.57644	1.83852	3.94559e-05	0.00135827
irg1	19.8878	4.31381	5.91825e-09	6.52789e-07
tram2	3.25487	1.7026	0.000338583	0.0078539
si:dkey-27h10.2	39.2866	5.29596	3.49716e-07	2.5259e-05
echdc2	12.104	3.59742	1.90724e-07	1.45185e-05
ccdc88b	3.66696	1.87458	6.46929e-05	0.00205073
C11H1orf106 (1 of 2)	8.28637	3.05074	4.21737e-05	0.00143357
arhgef10lb	5.08732	2.34691	2.70494e-06	0.00014331
si:dkey-9i23.15	2.41626	1.27277	0.00341528	0.0450487
lyn	4.92058	2.29883	6.37435e-06	0.000296998
cmss1	2.51202	1.32885	0.00344246	0.0452968
cldne	13.2984	3.73318	4.9686e-10	6.93007e-08
gsnb	22.2619	4.47651	0.000243847	0.0060363
psat1	2.88342	1.52778	0.000722986	0.0138765
bcl6ab	4.17023	2.06013	5.54385e-05	0.00178618
alg2	3.28084	1.71406	0.00379005	0.0485697
hcls1	9.79979	3.29275	0.0011931	0.0203259
MFAP4 (4 of 14)	16.6009	4.05319	3.05291e-05	0.00109818
gfpt2	11.9996	3.58491	0.000301193	0.00719502
CABZ01057013.1	3.92886	1.97411	9.95248e-05	0.00295148
tdg	2.53218	1.34038	0.00325413	0.0432398
stx11a	4.03856	2.01384	2.62817e-05	0.000972919
gpr1	3.65703	1.87067	0.000258283	0.00633626
grn2	32.1926	5.00866	0.000112813	0.0032737
si:ch211-209j10.5	2.82592	1.49872	0.00123638	0.0208659
ST14 (2 of 3)	5.79705	2.53532	2.12402e-06	0.000116843
pdgfrb	2.54567	1.34805	0.00342472	0.0450907
gipc2	4.28569	2.09953	0.00258041	0.0364853
rcc1	6.60476	2.72351	4.87858e-07	3.32713e-05
si:dkey-157l19.2	3.37465	1.75474	0.00033368	0.00778192
si:ch211-244b2.4	4.14887	2.05272	4.50253e-05	0.00150915
polr2i	4.57549	2.19393	1.66357e-05	0.000664784
ybey	2.67922	1.42181	0.0019223	0.0292663
gle1	3.16325	1.66141	0.000534461	0.0110464
mki67	18.7507	4.22888	0.000356664	0.00810801
ptprea	2.64968	1.40582	0.00298149	0.0405389
cldna	7.84338	2.97148	2.41238e-07	1.79839e-05
cbsb	4.6996	2.23254	3.68717e-05	0.00128569
havcr1	12.2319	3.61258	9.23746e-05	0.00277368
si:ch211-161h7.6	4.18606	2.06559	0.000846087	0.0156338
adamtsl7	68.1148	6.0899	1.47058e-12	3.75185e-10
hcar1-4	5.15487	2.36594	0.000578099	0.0117919
mafbb	2.90747	1.53977	0.00272345	0.0377425
slc43a2b	30.7726	4.94358	1.51127e-08	1.5339e-06
si:ch211-11c15.3	3.33449	1.73747	0.000594719	0.0120417
mxa	8.45724	3.08019	1.70243e-07	1.30978e-05
ap1g2	10.852	3.43989	2.32529e-08	2.26444e-06
entpd2a.1	3.43007	1.77824	0.000974823	0.017533
si:dkeyp-9d4.2	5.51582	2.46357	0.000755014	0.0143307
si:dkey-31f5.8	10.3622	3.37325	1.83236e-06	0.000102361
ITGAE (1 of 2)	11.8458	3.5663	0.000169569	0.00457668
si:ch211-272h9.1	3.85773	1.94775	0.000420589	0.00922183
si:rp71-68n21.9	4.24755	2.08663	0.00150351	0.0240774
ugt2a4	5.56308	2.47588	0.000215925	0.00548741
cd151l	2.64345	1.40242	0.00323349	0.0430713
sesn2	4.52398	2.17759	0.000103421	0.00304613
kifap3b	3.15415	1.65725	0.00154401	0.0245224
gpr84	23.1127	4.53061	1.18586e-05	0.00049975
mpzl2b	4.9114	2.29613	1.47794e-05	0.000602859
f5	4.60405	2.2029	0.0022393	0.0327769
MFAP4 (5 of 14)	26.434	4.72432	3.18337e-10	4.61888e-08
cyth4b	4.32662	2.11324	0.000135861	0.00378688
kdelc2	3.82609	1.93587	0.000356366	0.00810801
zgc:162193	3.64911	1.86755	0.00301601	0.0408797
ppox	2.78841	1.47944	0.00297269	0.0405211
SNAP23 (2 of 2)	53.0588	5.72952	0.000395721	0.0087925
si:ch211-264f5.6	22.5599	4.49569	4.80488e-05	0.00159565
fkbp14	3.39085	1.76165	0.00089037	0.0163126
dnajb9a	2.92948	1.55064	0.00245682	0.0352448
phf5a	3.55928	1.83158	0.000723385	0.0138765
galk1	4.29287	2.10194	0.00023146	0.00581852
il11a	58.6803	5.8748	5.79315e-07	3.83003e-05
rasal3	5.9125	2.56377	3.26738e-05	0.0011618
ppp1r18	4.92064	2.29884	8.56736e-05	0.00260137
gnpda1	8.62385	3.10833	2.28141e-05	0.000865294
xpnpep2	3.89908	1.96313	0.000632561	0.0126506
si:ch211-217k17.11	6.67656	2.7391	0.000291794	0.00699366
hp	15.6284	3.9661	8.2528e-07	5.12693e-05
enpep	4.00751	2.00271	0.000398532	0.00883679
zgc:92360	9.80722	3.29384	7.09357e-07	4.53716e-05
cxadr	2.90714	1.5396	0.00352262	0.0460501
cisd2	3.30687	1.72547	0.00101297	0.018039
malt1a	3.25693	1.70351	0.00292457	0.0400167
cant1b	3.37486	1.75483	0.00104189	0.018478
spint1b	3.61816	1.85526	0.00105298	0.0185529
il1b	36.4389	5.18741	0.00105485	0.0185708
card9	6.37267	2.6719	0.00258824	0.036572
il13ra2	4.07222	2.02582	0.000184606	0.00490094
cx35.4	3.52591	1.818	0.00270469	0.037603
tpm4b	3.43962	1.78225	0.00135607	0.0223282
tgm8	13.4203	3.74635	0.00172363	0.0268136
CABZ01021530.1	6.05576	2.59831	3.69996e-05	0.00128808
uap1l1	3.29955	1.72227	0.00325077	0.0432216
cdcp1a	3.65294	1.86906	0.00139356	0.0226659
si:ch211-240h7.2	4.61741	2.20708	0.000194285	0.00510357
chia.6	25.5897	4.67749	0.000389435	0.00873361
marcksb	19.3851	4.27688	1.04465e-08	1.08578e-06
si:dkey-195m11.11	35.0178	5.13002	1.53358e-07	1.19261e-05
OLFM4 (6 of 8)	51.8039	5.69499	0.000255857	0.00628566
smarcad1	3.87045	1.9525	0.000559479	0.0114866
si:dkeyp-69e1.8	3.64299	1.86512	0.000711033	0.0137248
myo9b	4.575	2.19377	0.000258503	0.00633626
apbb1ip	5.9764	2.57928	8.50569e-05	0.00258844
mfsd10	11.4728	3.52015	7.34625e-07	4.64382e-05
acat2	10.4249	3.38197	2.76824e-05	0.00101435
si:ch211-102c2.4	4.82561	2.27071	0.00152281	0.0242964
ccr12.3	4.33005	2.11438	0.000943675	0.0170865
alox5b.2	21.3465	4.41593	0.000786769	0.0147906
5_8S_rRNA	3.54871	1.8273	0.00299217	0.0406574
si:dkey-262k9.4	9.56586	3.25789	2.40227e-06	0.000129513
psip1	3.51584	1.81387	0.00153204	0.0243808
capn5a	4.38034	2.13104	0.000575108	0.0117517
ptger2b	7.47839	2.90273	1.13331e-05	0.00048197
CABZ01020207.1	3.49983	1.80729	0.00304372	0.0409808
pkz	3.03288	1.60069	0.00378172	0.0485697
rab34a	6.53491	2.70817	4.56114e-05	0.00152172
smc2	22.0761	4.46442	0.0019636	0.029686
dicp3.3	3.80493	1.92787	0.00198748	0.0299424
zgc:198419	5.89169	2.55868	7.98027e-05	0.00245413
CRFA31.2	5.48312	2.455	0.00131643	0.0217614
ncapd2	6.25455	2.64491	8.12155e-05	0.00248697
alg6	5.94967	2.57281	0.000105751	0.0030895
PLA2G4C (1 of 5)	5.83667	2.54514	0.00213253	0.0316208
vgll4l	40.7093	5.34729	1.08685e-08	1.12424e-06
tmem154	40.657	5.34543	8.07543e-09	8.47489e-07
arl3l2	16.9794	4.08572	1.2253e-07	9.88423e-06
ptprt	8.15562	3.02779	9.57283e-05	0.00285062
st14a	39.894	5.3181	8.26297e-05	0.00251956
aprt	4.46412	2.15838	0.00219566	0.0322035
tgm5l	45.2278	5.49914	8.08989e-07	5.05478e-05
plat	6.43897	2.68683	3.03137e-05	0.00109225
top2a	6.56762	2.71537	5.22853e-05	0.00170749
zgc:153911	8.056	3.01006	0.000243172	0.00602883
gpc1b	3.9659	1.98765	0.00172523	0.0268136
si:ch211-66k16.27	9.04364	3.1769	0.000527499	0.0109338
SLC7A5	4.85993	2.28093	0.000200093	0.00519304
bcl10	4.49776	2.16921	0.000261024	0.00638357
kcnk1a	7.81374	2.96601	0.000537288	0.0110836
C22H19orf10 (1 of 2)	3.21073	1.6829	0.00285838	0.03926
anln	13.8863	3.79559	1.80539e-06	0.000101379
papss1	6.59876	2.7222	5.5708e-05	0.00179219
tyms	21.2494	4.40935	2.56769e-07	1.90759e-05
smc4	19.8073	4.30796	0.000115361	0.00333868
FERMT3 (2 of 2)	6.53625	2.70846	0.000190344	0.00501224
glipr2l	8.74141	3.12787	1.31634e-05	0.000543089
gmip	4.35658	2.1232	0.00107507	0.0187889
flvcr2b	5.38148	2.428	0.000350553	0.00802903
CGREF1	8.65605	3.11371	1.77259e-05	0.000702769
plaua	16.7365	4.06492	3.61879e-07	2.59055e-05
sox9b	37.5109	5.22924	4.79576e-08	4.24916e-06
ms4a17a.9	11.5449	3.52918	4.57584e-06	0.000223307
si:ch211-272h9.2	7.57573	2.92139	2.38344e-05	0.000897692
lpcat2	9.47309	3.24384	1.82147e-05	0.000713376
rnf181	5.03154	2.331	0.00047613	0.0100719
btk	5.28519	2.40196	0.000481964	0.0101853
haus6	5.32826	2.41367	0.000636911	0.0127259
GPA33 (1 of 2)	11.2368	3.49016	6.51016e-05	0.00206066
creld2	8.43101	3.07571	9.13287e-06	0.000404487
rnpep	4.63535	2.21268	0.00195175	0.029604
tnfsf13b	4.09667	2.03445	0.00196309	0.029686
si:dkeyp-120h9.1	11.3795	3.50836	1.10579e-05	0.000472453
myo1eb	14.5335	3.86131	0.0021419	0.0316729
si:dkey-126g1.7	8.76688	3.13206	4.86646e-05	0.00161115
fat2	10.0922	3.33517	0.0003251	0.0076395
tfap2c	7.39106	2.88578	0.000795639	0.0149314
cdk2	5.07702	2.34398	0.000453277	0.00970237
kif22	3.94919	1.98156	0.00331912	0.0439089
elovl6	16.4068	4.03623	1.04601e-05	0.000453495
card11	5.8737	2.55427	0.00035059	0.00802903
tmem41b	4.02564	2.00922	0.00195458	0.029604
slc25a15a	9.76039	3.28694	0.000327926	0.00768087
tprg1	37.5058	5.22904	3.20072e-07	2.34564e-05
si:dkeyp-75b4.10	5.84951	2.54832	0.000673914	0.0132981
polr2h	4.4289	2.14695	0.00206424	0.0307559
caspa	13.4566	3.75024	0.00109426	0.0190015
si:dkey-122a22.2	15.5449	3.95837	2.13079e-05	0.000816764
arl4cb	15.5422	3.95812	4.32587e-06	0.000213032
pck2	5.75573	2.525	0.00022718	0.00573092
si:dkey-182g1.2	6.04377	2.59545	0.00171436	0.0267601
bcl3	31.5299	4.97865	6.6632e-07	4.31293e-05
tnfaip8l2b	4.59983	2.20158	0.00275821	0.0381752
PVRL4 (2 of 3)	7.0351	2.81457	0.000236664	0.00591496
orc3	5.12314	2.35703	0.000886561	0.0162843
cygb1	23.6437	4.56338	2.65172e-06	0.000141549
CABZ01090750.1	23.6299	4.56254	9.59677e-07	5.86081e-05
chst11	5.52235	2.46528	0.000422917	0.0092541
rdh12l	4.14105	2.05	0.00362519	0.0471421
gpx7	9.34403	3.22404	5.28699e-05	0.00172397
LIMA1 (2 of 2)	8.93185	3.15896	0.00373152	0.0480761
GPR97	6.54444	2.71027	0.000244311	0.0060363
PKN1 (2 of 2)	23.3438	4.54497	1.53602e-06	8.80825e-05
zgc:91849	34.7041	5.11703	1.72073e-05	0.000685091
pole	4.87566	2.2856	0.00118859	0.0202651
pcdh10b	33.9953	5.08726	2.08121e-05	0.000802024
baz1a	5.10044	2.35062	0.00121857	0.0206137
rbp1a	15.3372	3.93897	1.25377e-05	0.000521255
WDR77	4.9312	2.30194	0.00160167	0.0252932
mtf2	4.72322	2.23977	0.00160644	0.0253501
mapk12a	16.3383	4.03019	0.000343425	0.00791525
trim16	10.042	3.32797	7.53673e-05	0.00234441
lsr	14.108	3.81844	0.00202404	0.0303032
agpat9l	4.49082	2.16698	0.00281123	0.0388346
galnt6	14.8914	3.89641	1.7935e-05	0.000707547
fkbp11	22.1009	4.46603	2.87714e-06	0.000151647
cd44b	7.32837	2.87349	0.000189674	0.00500235
macc1	7.57853	2.92192	0.000141509	0.00392216
si:dkey-204f11.64	7.12427	2.83274	0.000468454	0.00994843
slc16a4	9.43489	3.23801	0.00021405	0.00546346
ppil1	9.38037	3.22964	0.000149402	0.00411455
CDA (3 of 3)	9.81814	3.29545	0.000149948	0.00412432
tex15	14.1814	3.82592	3.59837e-05	0.00126083
cd22	5.77556	2.52996	0.00115533	0.0198389
cyb561d2	7.58313	2.92279	0.000276074	0.00670612
tjp3	8.74596	3.12862	0.000278465	0.00674903
INCENP	5.90152	2.56109	0.0015528	0.0246295
neu3.2	11.159	3.48014	5.10153e-05	0.00167869
mpv17l2	11.1161	3.47458	5.12788e-05	0.00168224
mthfd1l	11.1161	3.47458	5.12788e-05	0.00168224
asf1ba	14.7008	3.87783	3.77628e-05	0.00131253
phf19	6.02856	2.59181	0.000526546	0.0109246
col11a1b	7.24585	2.85716	0.000391621	0.00875538
unc13d	14.2382	3.8317	0.000265419	0.00647639
chaf1b	25.0748	4.64817	1.34145e-05	0.000551345
pld1b	12.8162	3.6799	0.000105306	0.00308371
irf6	10.3292	3.36866	0.000105356	0.00308371
pik3r5	6.41633	2.68175	0.000758827	0.0143904
mst1ra	13.5659	3.76191	0.00143616	0.0232551
plekhf1	23.7617	4.57057	7.56545e-05	0.00234684
fanci	6.71469	2.74732	0.00145919	0.0234893
plk1	26.5939	4.73302	2.8717e-05	0.00104694
aqp11	9.59543	3.26235	0.000215104	0.00548389
ccnb1	12.4408	3.637	0.000304484	0.00724163
rln3a	25.2489	4.65815	6.01298e-05	0.001923
decr2	5.59602	2.4844	0.00284676	0.0391544
ngf	4.88696	2.28894	0.00284999	0.0391697
si:dkey-10p5.7	11.8371	3.56524	0.000439932	0.00952041
fa2h	21.5922	4.43244	6.17363e-05	0.00196723
mfsd6a	6.51301	2.70332	0.0028802	0.0395346
kifc1	6.68637	2.74122	0.00291929	0.0399697
TNFRSF1A (2 of 2)	21.0948	4.39881	6.3257e-05	0.00200815
selp	10.6859	3.41764	0.000624802	0.0125533
dnph1	8.91348	3.15599	0.000880684	0.0161901
clip2	9.70582	3.27885	0.00104466	0.0184831
CABZ01064972.1	15.5016	3.95434	0.000130489	0.00367801
csf2rb	20.2509	4.33991	0.000760174	0.0143907
si:dkey-1h24.6	23.0575	4.52716	0.000131319	0.00369178
cyp27c1	8.21596	3.03843	0.000895402	0.0163771
GRAMD1C	10.1849	3.34836	0.000898698	0.0163957
zgc:154006	8.65286	3.11318	0.00125023	0.021004
zgc:162184	9.33576	3.22277	0.00126542	0.0211579
CU468142.1	9.92354	3.31085	0.00127103	0.0211862
aff2	8.29913	3.05296	0.00128668	0.021381
si:ch1073-525h16.1	14.6208	3.86995	0.00248568	0.035541
e2f8	18.9664	4.24538	0.000196757	0.00512607
esrp2	8.97716	3.16626	0.00180727	0.0278683
snx10b	10.295	3.36387	0.00130208	0.0215872
si:ch211-69g19.2	9.5823	3.26037	0.00181006	0.0278914
SLC46A2	21.5415	4.42905	0.00019759	0.00514044
LDLR (1 of 3)	7.58044	2.92228	0.00182503	0.028082
esco2	18.6196	4.21875	0.000283871	0.00684933
ptpn22	18.5731	4.21514	0.000284428	0.00685513
GEN1	8.76601	3.13192	0.00183481	0.0281725
tbx2a	8.65614	3.11372	0.00257633	0.0364513
si:ch211-157c3.4	20.8985	4.38533	0.000287684	0.00690553
ncapg2	17.9776	4.16813	0.000415822	0.00913583
dkk1a	8.11233	3.02012	0.00372897	0.0480761
CD274	19.5799	4.2913	0.000682654	0.0133801
st14b	16.9419	4.08252	0.000619787	0.0124992
glis1b	16.89	4.0781	0.000621036	0.0125127
evplb	16.8148	4.07166	0.000622851	0.0125376
CU694453.1	16.3231	4.02884	0.000910452	0.0165682
ripk4	16.1728	4.0155	0.0009155	0.0166321
gins2	15.282	3.93376	0.00136047	0.0223666
esrp1	15.0852	3.91506	0.0013699	0.0224508
nusap1	11.2004	3.48548	0.00199842	0.0300075
itga4	16.6925	4.06113	0.0020107	0.0301451
gltpa	14.4431	3.85231	0.00202088	0.0302768
GDPGP1	16.0755	4.00679	0.00204717	0.0305647
ncapg	15.5968	3.96318	0.00300389	0.040741
PRC1 (1 of 3)	15.3147	3.93684	0.00302706	0.0409264
dctd	15.1766	3.92378	0.00303849	0.0409808

## Sheet: 0 dpt vs 1 dpt-down
geneID	foldChange	log2FoldChange	pval	padj
gapdh	0.365116	-1.45357	1.37822e-05	0.000564312
aldoaa	0.436916	-1.19457	1.67309e-05	0.000667353
mdh2	0.550092	-0.862256	0.000971379	0.0175002
atp2a2a	0.561832	-0.831789	0.00138365	0.0225589
IDH2	0.510473	-0.970092	0.000121576	0.00348127
nme2b.2	0.576497	-0.794616	0.00120499	0.0204328
vdac2	0.577331	-0.79253	0.000731645	0.0139977
ak1	0.53009	-0.915691	0.00013523	0.00378208
ldb3b	0.400471	-1.32023	2.37996e-08	2.29698e-06
rbpms2b	0.621551	-0.686054	0.00294798	0.0402097
rpl19	0.625922	-0.675945	0.00283368	0.0390698
AC024175.17	0.469391	-1.09114	5.88422e-06	0.000276546
synpo2lb	0.631422	-0.663324	0.0032883	0.0435867
pabpc4	0.474683	-1.07496	5.7423e-06	0.000271647
eef2l2	0.42775	-1.22516	9.96401e-08	8.22183e-06
btf3	0.525205	-0.929049	3.32317e-05	0.0011797
mt-nd6	0.607814	-0.718298	0.00268233	0.0373768
ckmt2b	0.391684	-1.35224	1.24413e-09	1.62029e-07
vdac3	0.609302	-0.71477	0.00100719	0.0179508
atp1a3b	0.564147	-0.825858	0.000573492	0.0117517
stau2	0.579253	-0.787735	0.000483992	0.0102082
nmrk2	0.531679	-0.911372	5.43257e-05	0.00175645
atp5j	0.614617	-0.70224	0.00124364	0.0209673
pdk2	0.463749	-1.10858	0.00230242	0.0335419
eif3c	0.531873	-0.910846	4.26194e-05	0.00144418
cox7a1	0.578698	-0.789116	0.000274601	0.00667784
lpl	0.322352	-1.63329	8.80976e-13	2.38073e-10
pdhb	0.648905	-0.62392	0.00345413	0.0454227
ppp1r13ba	0.534174	-0.904618	4.14773e-05	0.00141591
ckbb	0.483068	-1.0497	1.65766e-06	9.43078e-05
sorbs1	0.5541	-0.851783	0.000182691	0.00487003
gtpbp4	0.426196	-1.23041	2.16662e-08	2.1291e-06
ccni	0.530554	-0.914429	3.07163e-05	0.00110125
rsl24d1	0.4263	-1.23006	2.55792e-08	2.44689e-06
ndufb7	0.501933	-0.994434	3.81664e-06	0.000191555
adsl	0.590594	-0.759762	0.000351889	0.00804051
klhl31	0.500879	-0.997465	2.71121e-06	0.00014331
caprin1b	0.465301	-1.10376	4.03388e-07	2.83495e-05
cct8	0.542207	-0.883084	3.58208e-05	0.00125716
dusp6	0.624377	-0.679511	0.0014898	0.0239109
nsa2	0.570147	-0.810593	0.000124954	0.00354513
fh	0.634114	-0.657186	0.00189606	0.0289279
eif3d	0.560242	-0.835879	9.86307e-05	0.00293301
trim63	0.532672	-0.908681	0.000719894	0.0138499
hsc70	0.510946	-0.968756	7.13071e-06	0.000325917
ank3a	0.620813	-0.687769	0.00262371	0.0369098
eif2s3	0.638701	-0.646787	0.00233651	0.0339241
tuba8l2	0.544377	-0.877323	5.1774e-05	0.00169591
zgc:136474	0.566552	-0.81972	0.00124967	0.021004
eif3g	0.482397	-1.05171	1.15962e-06	6.86847e-05
eif3i	0.638416	-0.647432	0.00259737	0.036677
aldh6a1	0.526226	-0.926245	1.81148e-05	0.000712042
sf3b1	0.609296	-0.714784	0.00148594	0.0238991
gadd45g	0.402984	-1.31121	2.49611e-05	0.000928802
cebpd	0.540241	-0.888324	3.52883e-05	0.0012425
flncb	0.630573	-0.665265	0.00252905	0.0359707
DUSP27	0.476291	-1.07008	0.000751795	0.0142947
pim1	0.559233	-0.838479	0.000135105	0.00378208
eif3m	0.644104	-0.634635	0.0032184	0.0428968
tdh	0.31471	-1.66791	4.29545e-06	0.000212098
pnrc2	0.62193	-0.685176	0.0021954	0.0322035
CU571255.1	0.494091	-1.01715	5.6304e-06	0.000267525
txlnbb	0.380188	-1.39521	2.35874e-10	3.6153e-08
adprhl1	0.594327	-0.750671	0.000739816	0.0141166
nr4a1	0.303841	-1.71861	3.46106e-06	0.000176473
fam13b	0.628901	-0.669096	0.00204567	0.0305634
pcbp2	0.637668	-0.649123	0.00250277	0.0356829
mknk2b	0.370359	-1.433	1.18282e-10	1.93722e-08
notch1b	0.492533	-1.02171	7.48084e-06	0.000339053
eef1db	0.590678	-0.759556	0.000432914	0.00941567
tspan3a	0.557879	-0.841975	0.000122235	0.00349089
ldb3a	0.635062	-0.65503	0.00323755	0.0430989
rnf207b	0.631815	-0.662425	0.00301921	0.0408974
thbs3a	0.585322	-0.772698	0.000391154	0.00875538
ank3b	0.55563	-0.847803	0.00010541	0.00308371
ncor1	0.464402	-1.10655	9.90237e-07	6.02214e-05
ppip5k1b	0.628797	-0.669333	0.00217734	0.0320217
ddx21	0.420299	-1.25051	1.46693e-08	1.51017e-06
cnot6l	0.515778	-0.955179	1.56661e-05	0.000633057
si:ch211-233h19.2	0.539704	-0.88976	3.89046e-05	0.00134573
si:ch73-308b14.1	0.431653	-1.21206	0.00215098	0.031726
nexn	0.588998	-0.763665	0.000909604	0.0165668
rbp4	0.36533	-1.45273	2.16799e-10	3.34784e-08
sdk1a	0.584599	-0.77448	0.000399481	0.00884569
eif4ebp3l	0.616101	-0.698761	0.00310459	0.0416366
usp13	0.628552	-0.669897	0.00333591	0.0440825
nhsl1a	0.500929	-0.997322	6.6531e-06	0.000306028
rbpms2a	0.593001	-0.753895	0.000513442	0.010704
cacna1g	0.615407	-0.700388	0.00187084	0.0286241
zfand5b	0.351962	-1.50651	0.00247144	0.0353607
MAF1	0.626266	-0.675152	0.00373502	0.0480926
tob1a	0.496206	-1.01099	0.00236158	0.0341963
coq9	0.539369	-0.890655	4.13247e-05	0.00141585
SERBP1 (3 of 3)	0.504602	-0.986781	6.11293e-06	0.000286051
cfd	0.41627	-1.26441	9.40969e-05	0.00281756
ivd	0.62099	-0.687359	0.00150465	0.0240777
eif3s6ip	0.644515	-0.633714	0.00304432	0.0409808
arg2	0.399478	-1.32381	7.34386e-07	4.64382e-05
chchd6b	0.585582	-0.772056	0.000642777	0.0128194
UBAP2 (1 of 2)	0.603485	-0.72861	0.000861276	0.0158738
trib3	0.457412	-1.12843	7.2967e-07	4.63963e-05
bcat2	0.583183	-0.777978	0.000316969	0.0074997
slc25a33	0.417727	-1.25937	1.65497e-08	1.66413e-06
btg2	0.45682	-1.1303	0.000349672	0.00802501
tceb3	0.451716	-1.14651	1.52438e-07	1.18973e-05
aldh9a1a.1	0.603842	-0.727757	0.000759496	0.0143905
gltscr2	0.55709	-0.844017	0.000271015	0.0066055
LBH	0.611766	-0.708947	0.00330364	0.0437363
dars	0.630727	-0.664913	0.00171642	0.026773
NDUFA3	0.623935	-0.680532	0.00164849	0.0258814
spry4	0.337241	-1.56815	2.93836e-05	0.00106228
sec61g	0.547556	-0.86892	9.57134e-05	0.00285062
tomm20b	0.540528	-0.887558	4.53179e-05	0.00151443
gcn1l1	0.458892	-1.12377	3.04103e-07	2.23619e-05
sesn1	0.575388	-0.797392	0.000426989	0.00931491
per1b	0.595801	-0.747097	0.000818522	0.0152869
rem1	0.583602	-0.776944	0.0014874	0.0238991
mark2a	0.505796	-0.983373	1.26383e-05	0.000523426
CORIN (1 of 2)	0.599205	-0.738877	0.00111186	0.0192714
proza	0.4706	-1.08743	9.0287e-07	5.5769e-05
casq1b	0.426522	-1.22931	5.17871e-08	4.55116e-06
zgc:91860	0.495051	-1.01435	9.56195e-06	0.000420162
ube2e3	0.582544	-0.779562	0.000522212	0.0108555
insra	0.629911	-0.66678	0.00262566	0.0369098
bnip3lb	0.606786	-0.720741	0.000870153	0.0160101
iscub	0.541775	-0.884235	0.000104278	0.00306303
ralgapa1	0.613279	-0.705386	0.00189328	0.0289059
CU694368.1	0.283675	-1.81769	2.70551e-15	1.24448e-12
SERP1	0.498137	-1.00538	6.52845e-06	0.000302872
irf2bp2b	0.567932	-0.816209	0.000327498	0.00767915
cdc42bpb	0.555139	-0.849079	0.000187364	0.00495793
acadsb	0.6154	-0.700403	0.00126651	0.0211598
wnk1b	0.563054	-0.828655	0.000280198	0.00677584
arhgap29a	0.535769	-0.900318	0.000189737	0.00500235
spata20	0.528358	-0.920413	0.000314077	0.00745338
pik3c2a	0.61728	-0.696003	0.00262338	0.0369098
epo	0.603483	-0.728616	0.000847127	0.0156397
clstn1	0.580202	-0.785373	0.000476008	0.0100719
cd74a	0.41171	-1.2803	1.06996e-05	0.000461375
nedd4l	0.558624	-0.840052	0.000388405	0.00871954
ankrd9	0.297936	-1.74693	3.63011e-12	7.92721e-10
pptc7b	0.608003	-0.71785	0.00297865	0.0405389
pkmb	0.390715	-1.35581	6.23969e-09	6.77868e-07
mical2a	0.455193	-1.13545	5.42547e-07	3.64265e-05
tob1b	0.56318	-0.828333	0.000410243	0.00903162
BMP10 (1 of 2)	0.385656	-1.37461	3.52077e-09	4.09916e-07
ADAMTSL4	0.491964	-1.02338	6.6209e-06	0.000305197
ndufaf3	0.582913	-0.778647	0.000393536	0.00878005
si:dkey-205h13.1	0.463502	-1.10935	2.26859e-06	0.000123538
mylipa	0.470575	-1.0875	9.94451e-07	6.02214e-05
eif4ebp1	0.580944	-0.783528	0.000714152	0.0137605
chchd3	0.611023	-0.710702	0.00145716	0.0234741
bnip3	0.368272	-1.44116	7.06029e-10	9.48052e-08
ier5	0.622616	-0.683586	0.00242554	0.034917
pam	0.609309	-0.714755	0.00184093	0.028235
akt1s1	0.487318	-1.03706	4.47937e-05	0.00150372
ank2b	0.54024	-0.888329	0.000182386	0.00486791
pdhx	0.624953	-0.678181	0.0024048	0.034729
epdl1	0.37631	-1.41001	3.66409e-08	3.32039e-06
si:ch73-364h19.2	0.588669	-0.764471	0.000835229	0.0154861
hlfa	0.495824	-1.0121	1.86688e-05	0.000728981
lxn	0.618208	-0.693835	0.00179324	0.0276915
fkbp1b	0.605025	-0.724933	0.000918245	0.016654
hmgb3a	0.557464	-0.843049	0.000239533	0.00596597
tefb	0.601016	-0.734525	0.00121023	0.0204887
aamp	0.539112	-0.891343	0.00122663	0.0207176
cdh13	0.612318	-0.707648	0.00243485	0.0350226
gyg1a	0.588577	-0.764697	0.000821686	0.0153019
adh5	0.607584	-0.718843	0.00192674	0.0293132
dtnba	0.570452	-0.809823	0.000460428	0.00979723
slc25a28	0.561516	-0.832602	0.000241135	0.00599207
ndel1a	0.631731	-0.662617	0.00364474	0.0472963
mid1ip1l	0.507694	-0.977969	0.00195369	0.029604
sult2st1	0.451167	-1.14827	6.59671e-06	0.000304731
raly	0.610794	-0.711241	0.00193123	0.0293402
eif4a2	0.431932	-1.21112	5.66458e-06	0.000268558
PDE4DIP	0.53643	-0.898539	0.00127282	0.0211996
tsc1a	0.542894	-0.881257	0.00012309	0.00350603
si:ch211-212o1.2	0.61722	-0.696143	0.00372962	0.0480761
anks1b	0.580308	-0.785108	0.00113455	0.0195596
PCOLCE (2 of 2)	0.562114	-0.831065	0.000324551	0.00763605
fryb	0.568789	-0.814036	0.0003246	0.00763605
ip6k2	0.547033	-0.870301	0.000216978	0.00549923
mpped2	0.49364	-1.01847	0.00105	0.0185306
metap1	0.495813	-1.01213	1.24869e-05	0.000520144
si:dkey-51e6.1	0.550664	-0.860755	0.000194619	0.00510616
dap1b	0.44154	-1.17938	0.000337423	0.00783538
rnf25	0.499715	-1.00082	1.94939e-05	0.000755266
sqstm1	0.572166	-0.805495	0.001734	0.0268727
pygma	0.545159	-0.875252	0.00144722	0.0233488
si:ch211-209p16.4	0.593943	-0.751604	0.00176618	0.027293
cdon	0.543529	-0.879571	0.000216042	0.00548741
fkbp3	0.464614	-1.1059	1.48059e-06	8.55855e-05
PDPR	0.623028	-0.682632	0.00293585	0.0400949
mkrn1	0.564187	-0.825755	0.000498137	0.0104454
ppp1r12a	0.62911	-0.668617	0.00293548	0.0400949
pafah1b1a	0.591161	-0.758378	0.00145187	0.0234063
pbxip1a	0.471264	-1.08539	5.4612e-06	0.000260631
WWP1	0.610156	-0.712751	0.00249273	0.0356078
madd	0.501236	-0.996437	3.58198e-05	0.00125716
DDX17	0.59287	-0.754213	0.0014371	0.0232551
nampta	0.548293	-0.866981	0.000401467	0.00887456
acot11b	0.441377	-1.17992	4.90639e-07	3.33557e-05
PCBP4	0.565649	-0.822021	0.000851207	0.0157016
cd9a	0.607503	-0.719037	0.00142351	0.0230868
ly75	0.599208	-0.738872	0.00173273	0.0268727
si:dkey-180p18.9	0.594875	-0.749342	0.00198226	0.0299055
hip1	0.613961	-0.703782	0.00304271	0.0409808
slc43a1b	0.495752	-1.01231	2.14237e-05	0.000819749
ISCA2	0.552751	-0.855299	0.000295718	0.00707205
kmt2e	0.62882	-0.66928	0.00389674	0.0495764
lama5	0.550352	-0.861573	0.000204026	0.00525167
TP53BP1	0.459079	-1.12319	1.76355e-06	9.95459e-05
tnni3k	0.459677	-1.12131	4.34702e-06	0.000213587
prox1a	0.520015	-0.943374	0.000168005	0.00454011
mrpl23	0.592618	-0.754825	0.00108963	0.0189378
WIPF3	0.513959	-0.960276	4.46005e-05	0.00149956
nfu1	0.606929	-0.720401	0.00190454	0.0290164
baz2ba	0.557838	-0.842082	0.000452687	0.00969934
PELI3	0.499064	-1.0027	2.1281e-05	0.000816764
ryr3	0.387502	-1.36772	2.9376e-05	0.00106228
ezh1	0.51782	-0.949478	0.000120764	0.0034672
mrps35	0.561255	-0.833273	0.000395156	0.0087925
sdad1	0.478646	-1.06297	9.84433e-06	0.000430819
nfatc1	0.589921	-0.761406	0.00234099	0.0339664
rcan2	0.546441	-0.871861	0.000488045	0.0102837
aglb	0.565687	-0.821924	0.00120177	0.0204196
cacna1c	0.575082	-0.79816	0.00162136	0.0255483
pear1	0.598517	-0.740535	0.00241562	0.0348155
slc7a10a	0.588617	-0.7646	0.00119708	0.0203778
cul4b	0.602604	-0.730718	0.00354639	0.046298
acss1	0.606075	-0.722432	0.0023588	0.0341789
camk2b1	0.545188	-0.875174	0.000388241	0.00871954
rbm5	0.592548	-0.754997	0.00133534	0.0220037
ppifb	0.541673	-0.884505	0.000172947	0.00465621
kmt2a	0.543634	-0.879292	0.000325871	0.0076493
cyr61l2	0.55928	-0.838358	0.000594874	0.0120417
hmgn3	0.537775	-0.894925	0.000302712	0.00721537
RSL1D1	0.605157	-0.724619	0.00271005	0.0376533
agrn	0.527388	-0.923063	0.00024497	0.00604566
ucp3	0.494435	-1.01615	3.33963e-05	0.0011836
CCDC141 (1 of 2)	0.53197	-0.910584	0.000209199	0.00535229
ppp1r15a	0.582127	-0.780593	0.00167646	0.0262634
NOP14	0.518354	-0.94799	5.00133e-05	0.00165327
asap2a	0.424919	-1.23474	3.23363e-07	2.3538e-05
tmem178	0.575116	-0.798076	0.000725746	0.013901
zgc:65997	0.586389	-0.770069	0.00100371	0.0179037
smyd2a	0.556406	-0.845791	0.000670107	0.0132787
angpt1	0.582758	-0.779032	0.00174703	0.0270358
igfbp3	0.485041	-1.04382	0.000977147	0.0175602
ppp1r37	0.585912	-0.771243	0.00166371	0.0261015
PPM1K (2 of 2)	0.545838	-0.873455	0.00020856	0.00534224
dnaja2l	0.609853	-0.713467	0.00339792	0.0448746
tbc1d16	0.506237	-0.982114	5.74838e-05	0.00184242
dacha	0.607532	-0.718968	0.00279034	0.0385705
gbp	0.343726	-1.54067	8.18209e-07	5.09766e-05
zfyve16	0.49789	-1.0061	5.21184e-05	0.00170461
LGR4	0.51465	-0.958337	0.000176129	0.004736
trdn	0.588108	-0.765848	0.00284707	0.0391544
oxr1a	0.616947	-0.696781	0.00366378	0.047476
r3hdm1	0.409443	-1.28826	2.88762e-07	2.13793e-05
tmem11	0.616035	-0.698915	0.00389842	0.0495764
plekha7b	0.594324	-0.750679	0.00271972	0.0377313
bmp10	0.443811	-1.17198	2.37528e-06	0.000128745
pim3	0.490437	-1.02786	1.86806e-05	0.000728981
cirh1a	0.568486	-0.814803	0.00117892	0.0201161
riok2	0.588588	-0.764669	0.00125944	0.0211069
smad9	0.490304	-1.02825	0.00157972	0.0250015
tiam2a	0.438361	-1.18981	1.92467e-05	0.000747761
CU929119.2	0.508252	-0.976383	0.000120419	0.00346188
zfr2	0.602659	-0.730586	0.00223215	0.0326943
tenm1	0.550557	-0.861036	0.000675028	0.013303
ldb1a	0.535114	-0.902082	0.000548329	0.0112791
abca3b	0.585995	-0.771039	0.00195543	0.029604
rangap1a	0.494939	-1.01468	0.000625372	0.0125533
CU550708.1	0.543146	-0.880589	0.000351129	0.00803286
foxk1	0.461518	-1.11554	5.43957e-06	0.000260173
ctps1b	0.550243	-0.86186	0.000366519	0.00830585
pnpla7b	0.525335	-0.928691	0.000316623	0.0074997
AVPR1A (2 of 2)	0.582109	-0.780638	0.00199101	0.0299538
dnpep	0.549833	-0.862936	0.000395508	0.0087925
smarca1	0.457041	-1.1296	8.93649e-06	0.000397527
prx	0.516488	-0.953194	0.000208134	0.00533765
CABZ01062083.1	0.549363	-0.864169	0.0011471	0.0197288
DOCK9 (2 of 2)	0.578206	-0.790344	0.00126048	0.0211079
crebbpa	0.598775	-0.739914	0.00271847	0.0377313
qki2	0.567374	-0.817628	0.00252027	0.035893
CABZ01073112.1	0.509516	-0.972799	9.54645e-05	0.00285062
TNS3 (1 of 3)	0.446326	-1.16383	4.80608e-06	0.000233489
setd1a	0.590433	-0.760155	0.00242589	0.034917
p4ha2	0.613372	-0.705166	0.00385246	0.0492236
kank1	0.577108	-0.793087	0.00289396	0.0396731
zfpm1	0.537883	-0.894636	0.000246794	0.00608373
CU469500.4	0.529215	-0.918073	0.000331155	0.00773973
adhfe1	0.598396	-0.740828	0.00345638	0.0454246
spry2	0.556818	-0.844721	0.000771487	0.0145539
SIK3	0.543299	-0.880183	0.000283295	0.00684308
tbxas1	0.479762	-1.05961	2.59367e-05	0.000961795
mybphb	0.417901	-1.25877	1.05507e-06	6.31671e-05
eif2b2	0.524484	-0.931028	0.000179299	0.00481523
nbr1	0.575066	-0.798201	0.000992674	0.0177507
znf410	0.579366	-0.787452	0.00164117	0.0257853
mapre3b	0.584533	-0.774644	0.00327495	0.0434362
asb2b	0.603885	-0.727655	0.00352315	0.0460501
nckipsd	0.454211	-1.13856	4.91372e-06	0.000238183
FAM184A (1 of 2)	0.331091	-1.5947	1.40952e-06	8.21361e-05
CCSER2 (1 of 2)	0.567384	-0.817604	0.00149969	0.0240339
klhdc3	0.590433	-0.760155	0.00174359	0.027002
arhgap21b	0.519923	-0.94363	0.000611825	0.0123502
ago4	0.530843	-0.913642	0.000308561	0.00733052
zgc:92113	0.340645	-1.55366	1.72654e-09	2.18213e-07
cdkn1bb	0.42048	-1.24989	2.49553e-05	0.000928802
CABZ01086825.1	0.437794	-1.19168	2.70497e-06	0.00014331
bicc1b	0.556696	-0.845037	0.00172517	0.0268136
tenc1b	0.589667	-0.762027	0.00303641	0.0409808
gpsm1b	0.607725	-0.71851	0.00357877	0.0466329
VMO1 (1 of 2)	0.450738	-1.14964	1.07608e-05	0.0004625
ncoa6	0.595198	-0.748558	0.00262165	0.0369098
golga2	0.536577	-0.898143	0.000444698	0.00956609
fut8a	0.532276	-0.909752	0.000437405	0.00947521
s1pr5a	0.535522	-0.900981	0.000738221	0.0140986
FOXK2 (1 of 2)	0.442751	-1.17543	0.000103705	0.00305033
brdt	0.54736	-0.869437	0.000964427	0.0174102
rapgef2	0.566733	-0.819259	0.00127665	0.0212471
foxo3a	0.33079	-1.59601	9.06942e-08	7.54038e-06
PROB1	0.60469	-0.725732	0.00389126	0.0495764
pdcd4a	0.567515	-0.81727	0.00106571	0.0187162
si:dkeyp-69b9.3	0.437044	-1.19415	4.08089e-06	0.000203283
ctnnal1	0.515788	-0.955151	0.00108972	0.0189378
si:ch211-26b3.4	0.51697	-0.951847	0.000537193	0.0110836
HRC	0.426153	-1.23056	6.57732e-06	0.000304486
epha4a	0.400592	-1.3198	5.19217e-07	3.5078e-05
sema5a	0.451249	-1.14801	1.22197e-05	0.000511127
utp18	0.379407	-1.39818	0.00110369	0.0191498
vps13d	0.581287	-0.782677	0.00226208	0.0330655
ZNF609 (2 of 2)	0.577808	-0.791338	0.00172394	0.0268136
ar	0.521065	-0.940465	0.00034765	0.00798709
per3	0.572026	-0.805847	0.00222827	0.0326597
tenm3	0.55926	-0.83841	0.0021448	0.0316941
fgfr4	0.542436	-0.882475	0.000680733	0.0133667
zranb1b	0.475879	-1.07133	4.40634e-05	0.00148381
hmgxb4b	0.545388	-0.874644	0.000680485	0.0133667
fam213aa	0.587982	-0.766155	0.00199358	0.0299716
adcy6b	0.526174	-0.926387	0.000705634	0.0136721
AGFG2	0.54007	-0.888781	0.000666317	0.0132157
si:ch211-106h4.12	0.226694	-2.14118	1.97291e-14	6.9922e-12
bambia	0.559638	-0.837435	0.00198937	0.0299499
pdcd4b	0.375588	-1.41278	0.000399752	0.00884569
fam222ba	0.502409	-0.993065	0.000241134	0.00599207
foxk2	0.596402	-0.745643	0.00392583	0.0498254
KDM4A (1 of 2)	0.580077	-0.785685	0.00227673	0.0332572
acvr2aa	0.495119	-1.01415	0.00126347	0.0211416
lnx2b	0.537978	-0.894381	0.00105175	0.0185464
tsc1b	0.52695	-0.924261	0.000460013	0.00979723
lmod2a	0.443909	-1.17167	0.00377628	0.0485445
DNAJA4	0.491475	-1.02481	0.000159875	0.00435857
stard13b	0.468632	-1.09347	0.000761082	0.0143953
yy1b	0.57843	-0.789785	0.00244346	0.0351232
FOXO4	0.49766	-1.00677	0.000653611	0.0129905
TRAFD1	0.489879	-1.0295	0.000160679	0.00436984
znf326	0.481167	-1.05539	0.000122622	0.00349732
hmcn1	0.492148	-1.02284	0.000244306	0.0060363
PRKAB2	0.493987	-1.01746	0.000195712	0.00511633
h1f0	0.355355	-1.49267	0.000218057	0.00551366
flcn	0.539928	-0.88916	0.000844831	0.015624
tcf7l1a	0.574102	-0.800621	0.00364365	0.0472963
fmo5	0.575259	-0.797717	0.00228416	0.0333431
tsc2	0.518437	-0.94776	0.00390389	0.0496168
phtf2	0.519121	-0.945858	0.000353953	0.00806335
nlk2	0.551469	-0.858647	0.00206877	0.0308021
rad23ab	0.565431	-0.822578	0.00246025	0.0352677
ggnbp2	0.564379	-0.825263	0.00237885	0.0343772
pja2	0.454215	-1.13855	3.49329e-05	0.001232
asb2a.1	0.411654	-1.2805	1.14632e-05	0.000485927
plekha3	0.538504	-0.89297	0.000997732	0.0178264
gspt1	0.571786	-0.806453	0.0033034	0.0437363
AL929286.1	0.422731	-1.24219	0.000674162	0.0132981
CR855338.1	0.456275	-1.13203	7.72627e-05	0.0023862
si:ch211-236p5.2	0.496074	-1.01137	0.000818825	0.0152869
hook2	0.551378	-0.858886	0.00162368	0.0255662
ERRFI1 (2 of 2)	0.353209	-1.5014	0.000443719	0.00956609
pcmtd1	0.483078	-1.04967	0.000135928	0.00378688
rcl1	0.509145	-0.973851	0.000542807	0.0111761
sh2b1	0.551777	-0.857842	0.00284596	0.0391544
kdm6al	0.561068	-0.833752	0.00253492	0.0360305
SEMA4D	0.444175	-1.1708	3.25601e-05	0.00115998
si:ch211-120g10.1	0.44808	-1.15817	0.0015845	0.0250588
cnih3	0.487812	-1.0356	0.000237183	0.00592109
slit1a	0.420308	-1.25048	1.26381e-05	0.000523426
amotl2b	0.485442	-1.04263	0.000143846	0.00397167
aldob	0.36246	-1.46411	6.70002e-05	0.00210841
kbtbd12	0.551686	-0.858082	0.00215136	0.031726
SRF (1 of 2)	0.519379	-0.94514	0.000751321	0.0142947
ttc19	0.578247	-0.790241	0.00382949	0.048959
prodha	0.277051	-1.85178	1.4519e-09	1.85732e-07
vim	0.52432	-0.931481	0.00138913	0.0226311
axin1	0.471407	-1.08496	0.00016773	0.00453836
eya4	0.388703	-1.36326	3.71517e-06	0.000188099
TP53BP2 (2 of 2)	0.484188	-1.04636	0.000437062	0.00947521
si:dkey-178e17.3	0.545112	-0.875375	0.00229812	0.0335017
CSMD3 (3 of 3)	0.439891	-1.18478	6.17857e-05	0.00196723
kdm6a	0.551268	-0.859174	0.00304287	0.0409808
nedd9	0.534802	-0.902923	0.00124471	0.0209673
eif4ebp3	0.551894	-0.857536	0.002696	0.0375063
bckdhbl	0.519481	-0.944858	0.00122153	0.0206477
jph1b	0.508122	-0.976754	0.000916686	0.0166397
myoz2a	0.472002	-1.08314	0.000154069	0.00421623
tesk2	0.465886	-1.10195	0.000340181	0.00787835
adh8a	0.0670052	-3.89958	8.99076e-15	3.53402e-12
GPR125	0.560315	-0.83569	0.0030899	0.0414652
ndufaf6	0.490895	-1.02651	0.000511546	0.0106748
syngr2b	0.482758	-1.05063	0.000456582	0.0097538
fam131c	0.54713	-0.870045	0.00362631	0.0471421
si:dkey-266h18.3	0.49962	-1.0011	0.000430858	0.00938037
scaper	0.521983	-0.937926	0.0012453	0.0209673
pter	0.53431	-0.904252	0.00144089	0.023299
fam160b2	0.521271	-0.939894	0.00120544	0.0204328
BX323064.1	0.447864	-1.15887	0.000195375	0.00511633
psme4a	0.498059	-1.00561	0.0011411	0.0196569
si:dkeyp-67d2.4	0.519388	-0.945116	0.00210035	0.0311865
si:dkey-69o16.5	0.461721	-1.11491	0.000123329	0.00350821
CLDND1 (2 of 2)	0.534886	-0.902696	0.00307729	0.0413474
megf6a	0.372092	-1.42627	3.35647e-06	0.00017236
mfap5	0.399588	-1.32341	1.32455e-05	0.000545437
prr12b	0.477215	-1.06729	0.000333582	0.00778192
ITGB1BP2	0.450144	-1.15154	0.00013913	0.00386614
igfbp1b	0.279889	-1.83707	2.9899e-09	3.6111e-07
SSTR5	0.441959	-1.17802	8.16987e-05	0.0024947
cplx4c	0.413797	-1.273	2.49185e-05	0.000928802
TNS3 (2 of 3)	0.528661	-0.919584	0.00131385	0.0217614
ethe1	0.530502	-0.914569	0.00171943	0.0268005
PRODH (2 of 3)	0.436332	-1.1965	0.000202054	0.0052189
FSD2	0.373533	-1.42069	4.01116e-06	0.000200271
rprd2b	0.438746	-1.18854	6.99405e-05	0.0021882
sult2st2	0.406597	-1.29833	9.0141e-05	0.00272173
supv3l1	0.551958	-0.857369	0.0037016	0.0478618
PRODH (3 of 3)	0.37323	-1.42186	0.000152922	0.00419318
zgc:153981	0.498505	-1.00432	0.0011663	0.019948
ptch1	0.530537	-0.914475	0.00185164	0.0283503
ldlrad3	0.45119	-1.14819	0.000204052	0.00525167
MICAL2 (3 of 3)	0.397499	-1.33098	0.000212179	0.00542211
trioa	0.523111	-0.934811	0.00199874	0.0300075
rfxap	0.400855	-1.31885	1.92656e-05	0.000747761
oxr1b	0.508648	-0.975261	0.00154393	0.0245224
mapk8b	0.456604	-1.13098	0.000510385	0.0106609
CABZ01029366.1	0.429096	-1.22063	0.000112206	0.00326044
PGBD4 (3 of 8)	0.22172	-2.17319	5.98175e-08	5.13172e-06
zgc:158257	0.427205	-1.227	0.000128616	0.00363469
rdh14a	0.457012	-1.1297	0.000159161	0.00434459
rgs17	0.453187	-1.14182	0.000287797	0.00690553
sostdc1a	0.485646	-1.04202	0.00074714	0.0142312
arhgef11	0.471559	-1.08449	0.00125423	0.0210358
MAN1B1 (1 of 2)	0.522555	-0.936345	0.00332074	0.0439089
vsnl1a	0.484198	-1.04633	0.000679196	0.0133667
tesca	0.413512	-1.274	5.75249e-05	0.00184242
nrg2a	0.502333	-0.993284	0.00149676	0.0240048
crtc3	0.498509	-1.00431	0.00255317	0.0361947
lphn3.1	0.464958	-1.10483	0.000713839	0.0137605
EHBP1L1 (1 of 2)	0.468927	-1.09256	0.00382728	0.048959
BX897684.1	0.495922	-1.01181	0.00283053	0.0390512
wipf2b	0.386604	-1.37107	2.3469e-05	0.000885472
lpar2b	0.518512	-0.947552	0.00321749	0.0428968
cox4i2	0.524966	-0.929704	0.00372712	0.0480761
gsap	0.503021	-0.99131	0.00210426	0.031223
tox3	0.462448	-1.11264	0.000459861	0.00979723
PSME4 (3 of 4)	0.462137	-1.11361	0.00126962	0.0211862
ARHGEF17 (2 of 2)	0.500247	-0.999289	0.00294056	0.0401338
si:ch1073-416d2.4	0.325978	-1.61715	1.87369e-05	0.00072986
stambpb	0.418978	-1.25505	0.00020105	0.00519917
DOK7 (2 of 2)	0.310399	-1.6878	5.40209e-06	0.000259529
abcb6a	0.484769	-1.04463	0.00159582	0.0252194
AL929392.1	0.494414	-1.01621	0.00351141	0.0459523
bcr	0.4	-1.32193	7.91855e-05	0.00243862
l3mbtl1b	0.418577	-1.25643	0.000418533	0.00918606
SYNPO2L (1 of 2)	0.505675	-0.983718	0.00265096	0.0370227
CABZ01081375.1	0.455061	-1.13587	0.00111482	0.0192965
CABZ01058873.1	0.299166	-1.74098	0.000396487	0.00880047
odz4	0.463979	-1.10787	0.0018322	0.0281523
CABZ01030262.1	0.487573	-1.03631	0.00297777	0.0405389
gpr124	0.385702	-1.37444	0.000336276	0.00781714
PRRC2B	0.391961	-1.35122	0.000160895	0.00436984
nelfa	0.489557	-1.03045	0.00310994	0.0416825
trmt10c	0.396644	-1.33408	0.000116314	0.00336174
STOX2 (2 of 2)	0.485937	-1.04116	0.00326068	0.0432736
rtn4b	0.419095	-1.25465	0.000457258	0.0097586
fibpb	0.359334	-1.4766	0.000170222	0.00458857
banp	0.458774	-1.12415	0.00137932	0.0225223
tmcc2	0.318945	-1.64862	0.00115882	0.0198778
si:ch211-76m11.3	0.332211	-1.58983	0.000336025	0.00781714
ch1073-291c23.1	0.449391	-1.15396	0.00346591	0.0455221
DMPK	0.379531	-1.39771	0.000215874	0.00548741
kif26ba	0.406715	-1.29791	0.00073482	0.014046
tmtc1	0.431436	-1.21278	0.00152839	0.0243495
thap1	0.106581	-3.22998	5.94309e-13	1.65374e-10
mbnl3	0.313814	-1.67202	0.000195717	0.00511633
mdkb	0.261489	-1.93518	1.02763e-05	0.000447316
lrrfip1b	0.376036	-1.41106	0.000469691	0.00996493
smad4	0.417724	-1.25938	0.00141612	0.0229843
sgsh	0.425371	-1.23321	0.00261456	0.0368716
mterfd1	0.453149	-1.14194	0.00275044	0.038092
mbd6	0.420557	-1.24963	0.00163675	0.0257345
dre-mir-29b-1	0.419882	-1.25194	0.00119999	0.0204111
ccl20	0.320428	-1.64193	0.000414622	0.00911873
si:ch211-262n1.5	0.349107	-1.51826	0.00014089	0.00391001
cpne5	0.353375	-1.50073	0.0030229	0.0409218
foxn3	0.404669	-1.30519	0.0015197	0.0242647
CABZ01052953.1	0.337558	-1.56679	0.000218045	0.00551366
si:ch211-67f24.7	0.422247	-1.24384	0.00264176	0.036983
ZC3H8	0.377467	-1.40558	0.00108737	0.0189274
L3MBTL4	0.418118	-1.25802	0.0019297	0.0293376
rbm10	0.281983	-1.82632	1.98188e-05	0.000766482
actr3b	0.232467	-2.1049	1.50671e-06	8.6863e-05
GRINA	0.416	-1.26534	0.00311345	0.0417037
ABCA3 (2 of 2)	0.369643	-1.43579	0.000688599	0.0134575
mettl22	0.413703	-1.27333	0.00268323	0.0373768
pfkfb2b	0.366077	-1.44978	0.00104646	0.0184831
si:zfos-1451h6.1	0.392322	-1.34989	0.0020775	0.0309109
tmem37	0.33701	-1.56913	0.00066608	0.0132157
ncoa1	0.288128	-1.79522	9.45288e-05	0.00282658
cdkn1c	0.311931	-1.6807	0.000280158	0.00677584
CBFA2T3	0.407599	-1.29478	0.00320868	0.0428201
VGLL3	0.376779	-1.40821	0.00224322	0.0328121
angel1	0.392453	-1.34941	0.00245677	0.0352448
SYNDIG1	0.233001	-2.10159	0.00136708	0.0224318
tmem187	0.368699	-1.43949	0.00241519	0.0348155
thsd7ba	0.345832	-1.53186	0.00368273	0.0476748
FP017304.1	0.150165	-2.73538	1.64554e-07	1.27509e-05
vdrb	0.348691	-1.51998	0.00235102	0.034089
rdh8a	0.280563	-1.8336	0.000157908	0.00431583
si:ch73-59c19.2	0.321288	-1.63806	0.00150909	0.0241309
CABZ01074070.1	0.310005	-1.68963	0.000424985	0.00928856
FNDC7 (7 of 7)	0.285793	-1.80696	0.000797306	0.0149497
slc25a29	0.320952	-1.63957	0.00349349	0.0458287
tnfsf12	0.304836	-1.71389	0.00131798	0.0217673
FILIP1L (2 of 2)	0.195364	-2.35577	7.1571e-05	0.00223597
tmem237b	0.322808	-1.63125	0.00363916	0.0472806
si:ch211-152c8.5	0.0787978	-3.6657	0.00144666	0.0233488
zpcx	0.163726	-2.61064	0.000689091	0.0134575
ahsg	0.172381	-2.53633	0.00173308	0.0268727
BX324132.5	0.0529612	-4.23892	0.00179538	0.0277048
mmp17a	0.109939	-3.18522	0.00137349	0.0224611
SH3TC1 (1 of 2)	0.0701347	-3.83373	0.00214851	0.031726
ABI3BP (1 of 2)	0.0673342	-3.89252	0.00389253	0.0495764

## Sheet: 0 dpt vs 7 dpt -up
geneID	foldChange	log2FoldChange	pval	padj
col1a2	4.73939	2.2447	4.26364e-06	0.00220784
col1a1a	6.12886	2.61562	2.08416e-05	0.0076291
c6	2.9294	1.5506	1.92551e-05	0.00757046
anxa2a	2.06213	1.04414	4.84536e-06	0.00239237
ahnak	2.3509	1.23321	1.65684e-05	0.00663705
si:dkey-238c7.13	2.10929	1.07676	2.19903e-05	0.00765369
anxa1a	2.182	1.12565	1.17772e-06	0.000806583
sparc	3.64434	1.86566	1.83485e-07	0.0002035
fstl1b	2.07513	1.0532	2.70017e-06	0.00154939
postnb	15.6337	3.96659	7.4658e-07	0.000587061
ppdpfb	1.8778	0.909042	0.000171986	0.0384361
gstm3	4.06739	2.0241	2.96798e-09	6.30132e-06
eppk1	3.15068	1.65566	2.08108e-05	0.0076291
KRT18 (2 of 3)	2.61896	1.38899	2.5467e-05	0.00836035
col6a2	3.49733	1.80625	1.78844e-08	2.53136e-05
tfa	3.81529	1.93179	1.49869e-09	4.54553e-06
mdka	4.11912	2.04234	3.99338e-12	2.11958e-08
col5a1	5.32247	2.4121	0.000139197	0.0335828
adh8a	3.09435	1.62964	1.80472e-10	6.386e-07
clu	2.29248	1.19691	8.53457e-07	0.000647134
lamb1b	1.90531	0.930026	0.000189485	0.0419057
nktr	2.45494	1.29569	1.85834e-07	0.0002035
col12a1a	7.26492	2.86095	1.73191e-09	4.59626e-06
CR936442.1	6.32961	2.66212	4.45245e-06	0.00225071
tagln	5.99071	2.58273	2.81374e-09	6.30132e-06
vim	2.1285	1.08984	2.19297e-05	0.00765369
col16a1	2.16914	1.11712	2.02411e-05	0.0076291
dedd1	2.09861	1.06944	3.89194e-05	0.011638
zgc:171497	2.20501	1.14078	0.000148691	0.0350762
mfap5	2.28378	1.19142	9.2187e-06	0.00407754
nt5e	2.60743	1.38263	4.19598e-07	0.000371187
PARP6 (3 of 4)	2.46823	1.30348	4.31787e-05	0.0123882
dpt	4.29606	2.10301	1.25064e-08	1.8966e-05
loxl2b	4.93088	2.30185	5.16539e-07	0.000438665
igf2b	2.42298	1.27678	4.10992e-06	0.00218144
colec12	6.64233	2.73169	6.50532e-05	0.0179369
mxra8a	3.72533	1.89737	1.80819e-06	0.0011463
cpn1	3.86311	1.94976	3.34544e-07	0.000329539
mmp14b	4.4802	2.16356	9.83937e-07	0.000696332
mmp14a	3.45918	1.79043	9.53174e-07	0.000696332
CR388416.1	7.15423	2.8388	8.6244e-08	0.00011444
antxr1c	3.19909	1.67766	1.09724e-08	1.79197e-05
rnf213a	2.16728	1.11589	0.000131172	0.0323826
tcf21	2.35955	1.23851	3.85205e-05	0.011638
olfml3b	6.05617	2.59841	1.83572e-06	0.0011463
arhgap31	2.09831	1.06923	0.00021393	0.0454194
s100a10a	2.62579	1.39275	7.05262e-06	0.00325509
scara3	5.18889	2.37543	7.33346e-07	0.000587061
si:ch211-105c13.3	6.01273	2.58802	5.99438e-12	2.54533e-08
cxcl12a	3.71812	1.89457	4.49513e-09	8.67601e-06
bhmt	3.57306	1.83716	5.89442e-09	1.04287e-05
anxa5b	3.70999	1.89142	9.20331e-05	0.0238287
ptbp3	2.23615	1.16102	0.000145218	0.0346419
kirrela	2.81071	1.49093	3.29977e-06	0.00179634
si:ch211-198c19.3	3.01687	1.59305	0.000216495	0.0455089
mrc1b	6.13848	2.61788	0.000191705	0.0419597
PAMR1	2.54391	1.34705	4.11369e-05	0.0120444
sh3glb2a	2.34094	1.22709	0.000201877	0.0437353
spred2a	2.79843	1.48462	6.49365e-06	0.0030637
kcnq5a	2.62432	1.39194	8.4627e-06	0.0038228
mfap2	12.817	3.67999	3.41475e-07	0.000329539
SH3BGRL	2.35251	1.2342	0.000153082	0.0357151
gas1a	5.28082	2.40076	1.7803e-06	0.0011463
si:dkey-96g2.2	18.1808	4.18434	5.44337e-05	0.0152063
ada	2.30645	1.20568	0.00023953	0.0493734
BX548011.1	2.5833	1.36922	9.99011e-05	0.02525
zgc:92880	2.58482	1.37006	7.14454e-05	0.0194469
c1qb	3.56785	1.83506	0.000208329	0.0446771
tlr5b	3.17251	1.66562	2.13747e-06	0.00126057
mmp16a	7.29234	2.86638	4.19295e-07	0.000371187
prelp	2.55218	1.35173	7.75536e-05	0.0208423
si:ch211-220f16.2	2.75223	1.4606	3.57557e-05	0.0111206
dbn1	3.83506	1.93925	1.91701e-07	0.0002035
serpinh1a	2.84336	1.5076	2.31731e-05	0.00793529
tnfsf10	3.45995	1.79075	1.45041e-05	0.00603795
txn	6.34722	2.66612	1.372e-05	0.00594469
CHST15	2.92519	1.54853	8.74105e-05	0.0229113
si:ch73-22o12.1	3.42618	1.7766	0.000135423	0.0330478
PHLDB2 (2 of 2)	6.5347	2.70812	2.15131e-05	0.00765369
col11a1b	31.2531	4.96593	3.10946e-14	2.20056e-10
TNFRSF14 (6 of 12)	3.24618	1.69874	2.47934e-05	0.00835539
col12a1b	115.627	6.85333	1.64209e-19	3.48633e-15
si:ch211-39i22.1	16.0941	4.00846	3.07136e-14	2.20056e-10
cmtm6	3.1068	1.63543	7.91047e-05	0.0209934
snai2	4.45408	2.15513	2.09442e-06	0.00126057
lum	8.25178	3.04471	1.89247e-07	0.0002035
si:ch211-5k11.6	4.33041	2.1145	6.14809e-06	0.00296659
vasna	3.9501	1.98189	3.61416e-05	0.0111206
si:ch211-11c15.3	4.23149	2.08117	1.98508e-05	0.0076291
slc16a9a	4.34396	2.11901	0.000170543	0.0384361
spi1b	14.0591	3.81343	4.14129e-05	0.0120444
CABZ01020207.1	4.83465	2.27341	0.000234475	0.0488052
si:ch211-59h6.1	6.37281	2.67193	3.26912e-06	0.00179634
mcm2	5.68992	2.50841	2.55957e-05	0.00836035
ITGAE (2 of 2)	5.9086	2.56282	0.000111933	0.0279582
ndst3	8.26893	3.0477	3.02574e-05	0.00973325
si:busm1-57f23.1	14.5195	3.85992	3.41557e-05	0.0108233
si:dkey-204f11.64	10.0258	3.32564	9.97971e-05	0.02525
ptprt	7.44792	2.89684	0.000170274	0.0384361
CABZ01090750.1	17.5368	4.13232	5.30665e-05	0.0150221
si:ch73-27e22.8	Inf	Inf	1.53293e-05	0.00625877

## Sheet: 0 dpt vs 7 dpt-down
geneID	foldChange	log2FoldChange	pval	padj
ABCC6	0.485136	-1.04354	0.00016031	0.036995
cxcr3.1	0.378753	-1.40067	1.43685e-05	0.00603795
